# Supplementary material
Source: PubMed Central journal article supplement (PMC6727266)
Supplement: ASN.2019010009SupplementaryData1.pdf [file ASN.2019010009SupplementaryData1.pdf]

**Performance of Estimated GFR Slope as a Surrogate Endpoint for Kidney Disease Progression in Clinical Trials: A Statistical Simulation**

**Supplemental Materials**

Supplemental Appendix 1: Abbreviations, units, and terms ..... 3

Supplemental Appendix 2: Protocol summary ..... 5

    Background and rationale ..... 5

    Dataset development..... 6

    Supplemental statistical methods ..... 7

Supplemental Table 1. Study inclusion criteria..... 11

Supplemental Table 2. Studies pooled by intervention..... 12

Supplemental Table 3. Description of studies ..... 13

Supplemental Appendix 3: Analyses of previous studies ..... 15

Supplemental Table 4. Patient characteristics by study ..... 17

Supplemental Table 5: Distribution of key input parameters for statistical simulations ..... 19

Supplemental Figure 1. Meta-regression relating ratios of slope standard deviations to ratios of mean chronic slopes between treatment and control groups ..... 20

Supplemental Table 6A: Gains in efficiency (with simulation standard errors in parentheses) for the total slope compared to the clinical outcome when the long-term treatment effect is intermediate between uniform and proportional and there is no acute effect..... 21

Supplemental Table 6B: Gains in efficiency (with simulation standard errors in parentheses) for total slope and chronic slope compared to the clinical outcome when the long-term treatment effect is intermediate between uniform and proportional and there is a moderate negative acute effect ..... 22

Supplemental Appendix 4: Legends for supplemental figures ..... 23

Supplemental Figure 2: Relationship of relative efficiency of alternative endpoints vs. type of long-term treatment effect when there is no acute effect and progression is fast ..... 26

Supplemental Figure 3: Required total sample size of alternative endpoints when the long-term treatment effect is fully proportional and there is no acute effect..... 27

Supplemental Figure 4: Required total sample size of alternative endpoints when the long-term treatment effect is intermediate between proportional and uniform and there is moderate negative acute effect which attenuates ..... 28

Supplemental Figure 5: Required total sample size of alternative endpoints when the long-term treatment effect is intermediate between proportional and uniform and there is moderate negative acute effect which does not attenuate..... 29

Supplemental Figure 6: Relationship of relative efficiency of alternative endpoints vs. standard deviation of GFR slopes when there is no acute effect and the long-term treatment effect is intermediate between proportional and uniform ..... 30

Supplemental Figure 7: Bias and risk of false positive and false negative conclusions when there is no long term treatment effect and follow-up time is short ..... 31

Supplemental Figure 8: Bias and risk of false positive and false negative conclusions when there is no long term treatment effect and follow-up time is long ..... 32

Supplemental Figure 9: Estimated treatment effects on the chronic and total slopes when there is no long-term treatment effect and follow-up time is intermediate, and the acute effect does not attenuate ..... 33

Supplemental Appendix 5: Guide to Excel Spread Sheet with Expanded Results ..... 34

Supplemental Appendix 6: Study funding sources ..... 36

References ..... 39

## Supplemental Appendix 1: Abbreviations, units, and terms

|                               |                                                                                                                            |
|-------------------------------|----------------------------------------------------------------------------------------------------------------------------|
| AASK                          | African American Study of Kidney Disease and Hypertension                                                                  |
| ABCD                          | Appropriate Blood Pressure Control in Diabetes trial                                                                       |
| ACEI                          | angiotensin-converting enzyme inhibitor                                                                                    |
| ACR                           | albumin to creatinine ratio                                                                                                |
| ADVANCE                       | Action in Diabetes and Vascular Disease: Preterax and Diamicron MR Controlled Evaluation trial                             |
| AIPRI                         | The Angiotensin-converting-enzyme Inhibition on Progressive Renal Insufficiency trial                                      |
| Alb Protocol                  | albuminuria targeted protocol                                                                                              |
| Alternative clinical endpoint | ESKD, 40% GFR decline and GFR < 15 mL/min per 1.73 m <sup>2</sup>                                                          |
| ALTITUDE                      | Aliskiren Trial in Type 2 Diabetes Using Cardiorenal Endpoints                                                             |
| Aus                           | Australia                                                                                                                  |
| AZA                           | azathioprine                                                                                                               |
| BP                            | blood pressure                                                                                                             |
| CanPREVENT                    | Canadian Prevention of Renal and Cardiovascular Endpoints Trial                                                            |
| Clinical endpoint             | ESKD, doubling of serum creatinine and GFR < 15 mL/min per 1.73 m <sup>2</sup>                                             |
| CI                            | confidence interval                                                                                                        |
| CKD                           | chronic kidney disease                                                                                                     |
| CNS                           | cause not specified                                                                                                        |
| CSG                           | Collaborative Study Group                                                                                                  |
| DIET                          | low protein diet                                                                                                           |
| EMA                           | European Medicines Association                                                                                             |
| EMPA                          | Empagliflozin                                                                                                              |
| EMPA-REG OUTCOME              | Empagliflozin Cardiovascular Outcome Event Trial in Type 2 Diabetes Mellitus Patients (referred to as EMPA-REG here on in) |
| ESKD                          | end-stage kidney disease                                                                                                   |
| Est                           | estimate                                                                                                                   |
| Eur                           | Europe                                                                                                                     |
| F/U                           | follow-up time (months)                                                                                                    |
| FDA                           | Food and Drug Administration                                                                                               |
| GFR                           | glomerular filtration rate(mL/min/1.73 m <sup>2</sup> )                                                                    |
| Glom                          | glomerular disease                                                                                                         |
| GLUC                          | intensive glucose                                                                                                          |
| GMR                           | geometric mean ratio                                                                                                       |
| HALT-PKD                      | Halt Progression of Polycystic Kidney Disease study                                                                        |
| HKVIN                         | Hong Kong study using Valsartan in IgA Nephropathy                                                                         |
| HR                            | hazard ratio                                                                                                               |
| HTN                           | hypertension                                                                                                               |
| IDNT                          | Irbesartan Diabetic Nephropathy Trial                                                                                      |
| IgA                           | immunoglobulin A nephropathy                                                                                               |
| Interv                        | intervention                                                                                                               |
| IS                            | immunosuppression                                                                                                          |
| MASTERPLAN                    | Multifactorial Approach and Superior Treatment Efficacy in Renal Patients with the Aid of Nurse Practitioners study        |
| MDRD Study                    | Modification of Diet in Renal Disease study                                                                                |

|               |                                                                                                    |
|---------------|----------------------------------------------------------------------------------------------------|
| Mem or Mebran | membranous                                                                                         |
| MMF           | mycophenolate mofetil                                                                              |
| N             | sample size                                                                                        |
| NA            | North America                                                                                      |
| NKF           | National Kidney Foundation                                                                         |
| ORIENT        | Olmesartan Reducing Incidence of Endstage Renal Disease in Diabetic Nephropathy Trial              |
| POM model     | power of the mean model                                                                            |
| PPV           | positive predictive value                                                                          |
| RASB          | renin-angiotensin system blockade                                                                  |
| RCT           | randomized controlled trial                                                                        |
| REIN          | Ramipril Efficacy In Nephropathy study                                                             |
| RENAAL        | Reduction of Endpoints in NIDDM with the Angiotensin II Antagonist Losartan study                  |
| ROAD          | Renoprotection of Optimal Antiproteinuric Doses study                                              |
| SCr           | serum creatinine (mg/dL)                                                                           |
| SD            | standard deviation                                                                                 |
| SE            | standard error                                                                                     |
| SHARP         | Study of Heart and Renal Protection                                                                |
| Simva/Eze     | simvastatin+ezetimibe                                                                              |
| STOP-IgAN     | Supportive Versus Immunosuppressive Therapy for the Treatment of Progressive IgA Nephropathy trial |
| SUN-MACRO     | Sulodexide Macroalbuminuria trial                                                                  |

## Supplemental Appendix 2: Protocol summary

### Background and rationale

Chronic kidney disease (CKD) is a significant global public health problem, but the progression of CKD is often slow and there are few specific symptoms until the stage of kidney failure has been reached. There is general agreement that biomarkers will be needed to approve new drugs to slow the progression of kidney disease. The two most widely studied biomarkers are glomerular filtration rate (GFR) and albuminuria - maximizing the information on both is desired.

The National Kidney Foundation (NKF) in collaboration with the Food and Drug Administration (FDA) held a Scientific Workshop in December 2012, "GFR Decline as an End Point in Clinical Trials in CKD". The results of the analyses performed for the workshop showed strong relationships between change in GFR and kidney failure and mortality in observational studies and based on analyses from past clinical trials and simulations proposed that a 30 or 40% decline in GFR would be an acceptable alternative endpoint in clinical trials in some circumstances<sup>1-5</sup>. Application of this endpoint is limited at higher baseline GFR and for agents that cause an "acute effect" on GFR. As such, these alternative endpoints are less applicable in drug development for drugs targeted at earlier stages of kidney disease and for many drugs with potential hemodynamic effects. Strategies to overcome these limitations include assessing changes in albuminuria (or proteinuria) as an earlier marker of kidney disease progression, alternative approaches to assessing GFR decline, and combinations of both strategies.

At higher GFR, a trial designed to compare mean slopes of GFR decline vs. time between randomized groups may have greater statistical power than comparison of time to a designated GFR decline from baseline such as 30% or 40%. However, acute effects are often greater at higher GFR levels, so they can in some cases pose a more serious problem at higher GFR. Design and analytic strategies proposed to overcome these limitations include evaluation of a "chronic" slope evaluated during the portion of follow-up after acute effects are expected to occur, rather than "total slope from randomization", and evaluation of reversal of acute effects following discontinuation of treatment, or both. However, there is no generally accepted method, and there is substantial controversy.

In March 2018, the NKF, in collaboration with the FDA and European Medicines Agency (EMA), sponsored a scientific workshop "Change in Albuminuria and GFR as Endpoints for Clinical Trials in Early Stages of Chronic Kidney Disease" to evaluate surrogate endpoints for trials of kidney disease progression and improve understanding of change in albuminuria and GFR as measures of kidney disease progression. The Workshop was chaired by Andrew S Levey, MD and Ron Gansevoort, MD and was supported by the planning committee and operations committee. Planning and operations committee members consisted of Andrew Levey (Chair), Ron Gansevoort, Josef Coresh, Dick de Zeeuw, Kai-Uwe Eckardt, Hrefna Gudmundsdottir, Adeera Levin, Romaldas Maciulaitis, Tom Manley, Vlado Perkovic, Kimberly Smith, Norman Stockbridge, Aliza Thompson, Thorsten Vetter, Kerry Willis, and Luxia Zhang. Prior to the workshop, the protocol was reviewed by the planning committee, analytical committee and stakeholder advisory group and was available at <https://www.kidney.org/CKDEndpoints>.

For this workshop, analyses were performed to support the validity of albumin to creatinine ratio (ACR) change and GFR slope as surrogate endpoints. Here we report the results of a statistical simulation study designed to determine the conditions in which analyses based on the chronic and total GFR slope provide substantial increases in statistical power compared to analyses of the clinical endpoint without incurring an inflated risk of false positive conclusions of benefit or false negative conclusions of harm.

## Dataset development

For our prior work investigating surrogate endpoints, we had performed a systematic search of the literature and developed a pooled database from January 1 1946 to May 15 2007.<sup>2,6</sup> To update this dataset for the current analysis, we repeated our systematic search beginning May 16 2007 when the initial search had been completed and ending in December 15, 2016. In addition, we reviewed references of published meta-analyses of RCTs including the REASSURE study.<sup>7,8</sup> **Supplemental Table 1** lists all of the inclusion criteria. Our goal was to include all studies where there was sufficient progression of kidney failure for analyses and to include studies of rarer diseases. We therefore varied the number of events required for inclusion based on disease state. For studies of glomerular disease, we required 10 events whereas for studies of other kinds of CKD, we required 30 events as well as 500-person years of follow-up and for studies of high-risk populations, we required 30 events and 1000 person years of follow-up.

We were able to identify, obtain agreement and obtain access to 49 studies that had sufficient data. We were not able to obtain data or data was not sufficient in 12 studies. For trials that evaluated more than one intervention, we included a separate group for each independent treatment comparison, such that some participants were included in more than one analytical comparison<sup>9-13</sup>. We then pooled small studies that had less than 100 participants if the disease and intervention was the same<sup>14-26</sup> (**Supplemental Table 2**). This process resulted in 47 distinct randomized treatment group comparisons, which are described in **Supplemental Table 3**.

## Supplemental statistical methods

### *Part 1: Simulation of GFR trajectories and ESKD and death events.*

The purpose of the statistical simulations is to provide accurate comparisons of the performance of analyses of alternative slope and time-to-event endpoints when these analyses are performed on the same data set. This assures that the simulations provide comparisons of performance between analyses of different endpoints that are calibrated to the same data and to the same underlying treatment effects. By contrast, standard power calculations for slope and time-to-event endpoints express required sample sizes in terms of different metrics of effect size which are not directly comparable. For example, in a given study, a 25% difference in mean slope may translate to a hazard reduction for time to event outcomes based on ESKD and GFR change which may either be substantially greater or substantially smaller than 25%, depending on the characteristics of the study population and the study design. Hence, if standard power calculations were used, differences in required sample sizes between different endpoints would largely reflect differences in the way treatment effects are calibrated between methods as opposed to true differences in statistical power between the different endpoints.

*Step 1: Simulation of GFR-trajectories prior to the active treatment intervention.* The simulations used a growth curve model in which each subject's GFR measurements vary randomly about a subject-specific linear trajectory defined by random intercepts and slopes<sup>27</sup>. We generated the subject-specific slopes according to a generalized log-gamma distribution which approximates a normal distribution but has a slight negative skewness to account for fast progressors with steeper than normal GFR slopes<sup>28</sup>. We generated GFR measurements to be normally distributed around these trajectories. The standard deviations of the GFR measurements were assumed to be proportional to the square root of the predicted GFR based on each the trajectories defined by each patient's random intercept and slope to account for greater variability of GFR measurements at higher GFR levels<sup>1</sup>. After this first step, the distribution of the GFR trajectories was the same in the active treatment and control groups. Steps 2 and 3 below modified these GFR trajectories to account for the long and short-term treatment effects for patients in the active treatment group.

*Step 2: Simulation of long-term treatment effects on GFR-slope.* We simulated three types of long-term treatment effects on the chronic slope: a) a uniform effect, in which the same treatment effect is assumed for all patients, irrespective of their rate of progression, b) a proportional effect, in which the treatment effect is proportional to the rate of GFR decline among patients with negative slopes but the treatment has no effect among patients whose slopes would have been greater than 0 without the treatment, c) an intermediate model halfway between the uniform and proportional effect models (see Table 1 footnote).

Under the uniform effect model, long-term GFR slopes for patients in the treatment group were simulated by adding a constant to the slopes that would have been observed without treatment. Note that the uniform long-term treatment effect implies that some patients who would have had positive or only slightly negative GFR slopes without treatment will have their slopes shifted to larger positive slopes with treatment.

Under the proportional effect model, the distribution of the long-term GFR slopes in the treatment group were generated by simulating the slope of the  $i$ th patient as  $\beta_i \times \{(1-k)1[\beta_i < 0] + 1[\beta_i \geq 0]\}$ , where  $\beta_i$  denotes the slope the patient would have had without the treatment,  $k$  is the proportional reduction due to the treatment among patients whose GFR would have declined without the treatment, and  $1[\beta_i < 0]$  and  $1[\beta_i \geq 0]$  are 0-1 indicator variables for negative and zero or positive slopes, respectively. Thus the

proportional effect model assumes the treatment reduces the magnitude of the slope by 100 x k percent among patients whose slope would have been negative without the treatment but has no effect on patients whose slope would have been greater than or equal to 0 without the treatment.

Under the intermediate treatment effect model, the chronic slopes in the treatment group were generated as  $[\beta_i - (k/2) \times \text{mean}(\beta_i)] + [\beta_i \times \{(1-(k/2))1[\beta_i < 0] + 1[\beta_i \geq 0]\}]$ .

We note that the type of long term treatment effect, whether it be uniform, proportional, or intermediate, is a property of the full distribution of GFR slopes across the study population. The implications of the type of long-term treatment effect differ for different types of analysis. In particular, analyses of mean slope are best adapted to uniform or intermediate treatment effects since the analysis averages results over all patients, irrespective their rate of GFR decline. On the other hand, treatment effects on time-to-event outcomes based on designated declines in GFR or ESKD are most strongly influenced by the subset of fast progressors with steep GFR decline. Hence, time-to-event analyses, especially those based on very large GFR declines of 50% or more, are best adapted to intermediate or proportional treatment effects, and less so to uniform effects.

*Step 3: Simulation of the acute effect.* As described in the methods section of the manuscript, we simulated acute effects of the treatment by adding  $(K + \epsilon_i) \times (\text{GFR}_i(t) - 15 \text{ mL/min/1.73m}^2)$  to each treated patient's GFR level at all follow-up times  $t \geq 3$  months, where  $\text{GFR}_i(t)$  represents the patient's GFR at follow-up time  $t$  after incorporating the long term treatment effect but prior to adding the acute effect, and  $K$  is defined so that  $K \times (42.5 \text{ mL/min/1.73m}^2 - 15 \text{ mL/min/1.73m}^2)$  is equal either to -2.50, -1.25, 0, +1.25, or +2.50 mL/min/1.73m<sup>2</sup>. Under this formulation, the acute effect of the treatment is 0 when  $\text{GFR}_i(t) = 15 \text{ mL/min/1.73m}^2$ . Our formulation assumes that acute effects of the treatment occur fully by 3 months follow-up, and that the mean GFR slope is constant throughout the chronic phase of the study, which is assumed to start by the 3-month follow-up visit.

The  $\epsilon_i$  were simulated as a normal random variable with mean 0 and standard deviation 1 to account for random variation in the acute effect between patients.

*Step 4: Simulation of Relationships of GFR with kidney failure and death.* The mortality hazard rate was assumed to be linearly related to the patients' underlying predicted GFR, with higher death rates at lower GFR. Specifically, we first simulated each patient's projected GFR at the start of each 6-month time interval  $t$  during the follow-up period after accounting for the long-term treatment effect and the acute effect (denoted as  $E(\text{GFR}_i(t))$ ), and during that 6 month period mortality was assumed to be exponentially distributed with hazard rate equal to  $0.03375 - 0.00025 \times E(\text{GFR}_i(t))$ . ESKD was assumed to occur when either the GFR trajectory first declined below a patient-specific uniformly distributed random threshold between 6 and 15 mL/min/1.73m<sup>2</sup>.

*Step 5: Simulation of missing data.* All GFR measurements obtained after exponentially distributed loss-to-follow-up times were set to missing. The rate of loss-to-follow-up was set to 0.02 per patient-year. To account for intermittent missing GFRs, post-baseline GFR measurements prior to the end of follow-up were randomly set to missing according to independent Bernoulli random variables with probability of intermittent missingness equal to 0.05.

We note that while the simulations assume the GFR follow-up terminates at ESKD and death, the simulations assume that the timing of intermittent missing GFR measurements and of other types of premature loss-to-follow-up occur independently of the patient's GFR level. It is also of interest to



consider scenarios in which these types of missingness are related to GFR level; however, we defer this problem to subsequent research.

An important limitation of the simulations used for this manuscript is that they did not consider medication dropouts distinct from missing data. It is possible that such dropouts could lead to reversal of acute effects in these patients, leading to biases in analyses of the chronic slope. Due to the complexity of this issue, it will be evaluated in detail in a later publication.

We note that the magnitude of the treatment effects are not always directly comparable between different scenarios. For example, a 25% treatment effect has a different meaning for uniform and proportional effects. Thus, while comparisons of required sample size between methods can be made without qualification for any specific scenario, comparisons of required sample size between different scenarios need to account for differences in the interpretation of effect sizes between those scenarios.

### *Part 2: Analysis of simulated data.*

For each set of input parameters, we simulated 800 independent data sets, each with 500 subjects (250 assigned to the treatment and 250 to control). We then performed analyses of GFR slope based on mixed effects models and of the time-to-event outcomes using Cox proportional hazards regression for each simulated data set.

To estimate treatment effects on GFR slope, we fit a mixed effects shared parameter informative censoring model in which the patients' GFR declines after 3 months follow-up follow linear trajectories with normally distributed residuals whose standard deviations depend on the GFR level according to a power of the mean model<sup>29,30</sup>. The model included baseline GFR, treatment group, follow-up time, and interactions of follow-up time with baseline GFR and treatment group as fixed effects, and patient-specific intercepts and slopes as bivariate normally distributed random effects. To account for informative censoring, the composite endpoint of kidney failure or death was assumed to follow a Weibull distribution whose log-transformed rate parameter depends linearly on the random intercepts and slopes. For scenarios in which the mean number of ESKD or death events was smaller than 25 per 500 patients, the shared parameter component of the mixed effects model was dropped. Cox proportional hazard regression was used to estimate hazard ratios for the effect of treatment on each of the time-to-event endpoints while censoring death.

Note that the statistical models for the slope and time-to-event outcomes incorporate several simplifying assumptions which led to deviations from the actual simulated data. The key simplifications included the assumption of normally distributed slopes in both the treatment and control groups and Weibull distributions for ESKD or death conditional on the underlying GFR slopes and intercepts for the GFR slope analyses, and the implicit assumption of proportional hazards for the time-to-event analyses. These simplifications in the analytic models relative to the simulated data are intended to reflect real-world applications, where it is widely understood that parametric or semi-parametric statistical models invoke simplifying assumptions relative to complexities of real data.

### *Part 3. Estimation of required sample sizes and relative efficiencies.*

For each scenario, averages and standard deviations of the estimated treatment effects on each endpoint were obtained for the 800 simulated data sets. We obtained standard errors for sample sizes  $N$  that differed from 500 as  $SE(N) = SE(500) \sqrt{500/N}$ , where  $SE(500)$  is the standard deviation of the

estimated treatment effects across the 800 simulated data sets with  $N = 500$ . The means and standard errors for treatment effects from the simulations were used to estimate and compare the total sample sizes (counting patients in both the treatment and control groups combined) required to detect 25% treatment effects with 90% power and 2-sided  $\alpha=0.05$  based on each outcome (chronic and total slope, confirmed 30%, 40% and 57% GFR decline) for simulated scenarios with a benefit of the treatment on time to ESKD, and to compare bias and risk of a false conclusions of treatment benefit or harm for scenarios with no effect of the treatment on time to ESKD.

We compared the efficiency of the analyses based on the different outcomes by presenting the ratios of the total sample sizes required to achieve 90% power when using the clinical endpoint vs. the sample sizes required when using each of the other outcomes. These relative efficiencies were computed between the slope or the confirmed 30% and 40% GFR decline endpoints over either 2, 2.5-4, or 4-6 years vs. the clinical endpoint over 4-6 years in order to evaluate if the alternative endpoints can be used to simultaneously reduce follow-up duration and reduce sample size. We note that relative efficiencies greater than 1 indicate superior statistical power for the alternative endpoints vs. the clinical endpoint.

An important limitation of the simulations used for this manuscript is that they did not consider medication dropouts distinct from missing data. It is possible that such dropouts could lead to reversal of acute effects in these patients, leading to biases in analyses of the chronic slope. Due to the complexity of this issue, it will be evaluated in detail in a later publication.

Our results contain some random error because they are based on statistical simulation rather than theoretical calculation. We estimated the standard errors of the relative efficiencies obtained by the simulations by dividing the standard deviations of the relative efficiencies across the independent simulated data sets by the square root of the number of the 800 simulations for which convergence was obtained. We present the standard errors for the relative efficiency calculations in **Supplemental Table 6**.

### Supplemental Table 1. Study inclusion criteria

1. RCT
  2. Articles published in English
  3. Human subjects
  4. Adults
  5. Follow up > 12 months after first follow up measurement of UP or GFR
  6. Quantifiable albuminuria/proteinuria (ie not dipstick)
  7. GFR > 15
  8. First follow up albuminuria/proteinuria or Scr latest at 12 months
  9. Number of events (differ by disease)\*
    - a. Glomerular disease : >10 events
    - b. Kidney disease DM, HTN, PKD, nonspecified or other: follow-up > 500 person years and > 30 events\*
    - c. High risk population (diabetes, HTN, CVD, heart failure not selected for having kidney disease): follow-up > 1000 person years and > 30 events\*
- \*Events - (ESKD, 2X Scr, 40% or 30% decline)

**Abbreviations:** RCT randomized controlled trial; UP urine protein excretion; GFR glomerular filtration rate; Scr serum creatinine; DM diabetes mellitus; HTN hypertension; PKD polycystic kidney disease; CVD cardiovascular disease, ESKD end stage kidney disease.

**Supplemental Table 2. Studies pooled by intervention**

| <b>Study</b>                                                                                                                     | <b>Pooled group</b> |
|----------------------------------------------------------------------------------------------------------------------------------|---------------------|
| Pozzi 2004 <sup>22</sup><br>Katafuchi <sup>25</sup><br>Sчена <sup>26</sup>                                                       | Steroid             |
| Praga 2003 <sup>14</sup><br>HKVIN <sup>15</sup>                                                                                  | IgA-ACEI            |
| Maes <sup>20</sup><br>Appel <sup>21</sup>                                                                                        | IgA-MMF             |
| Pozzi 2010 <sup>23</sup><br>Pozzi 2012 <sup>24</sup>                                                                             | IgA-AZA             |
| Ponticelli 1989 <sup>17</sup><br>Ponticelli 1992 <sup>19</sup><br>Ponticelli 1998 <sup>18</sup><br>Ponticelli 2006 <sup>16</sup> | Mem-Ponticelli      |

**Supplemental Table 3. Description of studies**

| Intervention       | Disease                  | Study Name                                                          | Collaborators                                                             | Year | Region        | Creatinine calibration required* |
|--------------------|--------------------------|---------------------------------------------------------------------|---------------------------------------------------------------------------|------|---------------|----------------------------------|
| RASB v Control     | CKD (CNS)                | Kamper <sup>31</sup>                                                | Anne Lise Kamper, Svend Strandgaard                                       | 1992 | NA, Eur, Aus  | Yes                              |
|                    | CKD (CNS)                | Ihle/Kincaid <sup>32</sup>                                          | Gavin J. Becker, Benno Ihle, Priscilla S. Kincaid-Smith                   | 1996 | NA, Eur, Aus  | Yes                              |
|                    | CKD (CNS)                | Hou <sup>33</sup>                                                   | Fan Fan Hou                                                               | 2006 | Asia          | Yes                              |
|                    | CKD (CNS)                | Hannedouche <sup>34</sup>                                           | Thierry P. Hannedouche                                                    | 1994 | NA, Eur, Aus  | Yes                              |
|                    | CKD (CNS)                | Brenner <sup>35</sup>                                               | Barry M. Brenner                                                          | 1993 | NA, Eur, Aus  | Yes                              |
|                    | CKD (CNS)                | Toto <sup>36</sup>                                                  | Robert Toto                                                               | 1993 | NA, Eur, Aus  | Yes                              |
|                    | CKD (CNS)                | AIPRI <sup>37</sup>                                                 | Guisepppe Maschio, Francesco Locatelli                                    | 1996 | NA, Eur, Aus  | Yes                              |
|                    | CKD (CNS)                | REIN <sup>38</sup>                                                  | Giuseppe Remuzzi, Piero Ruggenti                                          | 1999 | NA, Eur, Aus  | Yes                              |
|                    | CKD (CNS)                | Van Essen <sup>39</sup>                                             | Paul E. de Jong, GG van Essen                                             | 1997 | NA, Eur, Aus  | Yes                              |
|                    | CKD (HTN)                | AASK <sup>10</sup>                                                  | Tom Greene                                                                | 2002 | NA, Eur, Aus  | Yes                              |
|                    | CKD (PKD)                | HALT-PKD A <sup>40</sup>                                            | Ronald D. Perrone, Vicente Torres, Arlene Chapman, Godela Brosnahan       | 2014 | NA            | No                               |
|                    | CKD (PKD)                | HALT-PKD B <sup>13</sup>                                            | Ronald D. Perrone, Vicente Torres, Arlene Chapman, Godela Brosnahan       | 2014 | NA            | No                               |
|                    | Diabetes                 | ADVANCE                                                             | Vlado Perkovic                                                            | 2008 | International | Yes                              |
|                    | Diabetes                 | ALTITUDE <sup>41</sup>                                              | Hans-Henrik Parving                                                       | 2012 | International | No                               |
|                    | Diabetes (CKD)           | RENAAL <sup>42</sup>                                                | Dick De Zeeuw, Hiddo J Lambers Heerspink, Barry M. Brenner, William Keane | 2001 | International | Yes                              |
|                    | Diabetes (CKD)           | ORIENT <sup>43</sup>                                                | Enyu Imai, Fumiaki Kobayashi, Hirofumi Makino, Sadayoshi Ito              | 2011 | Asia          | Yes                              |
|                    | Diabetes (CKD)           | IDNT <sup>9</sup>                                                   | Ed Lewis, Lawrence G. Hunsicker                                           | 2001 | International | Yes                              |
|                    | Diabetes (CKD)           | Lewis 1993 <sup>44</sup>                                            | Julia B. Lewis, Jamie P. Dwyer, Edmund J. Lewis, John M. Lachin           | 1993 | NA            | Yes                              |
|                    | Glom (IgAN)              | HKVIN <sup>15</sup>                                                 | Philip Kam-Tao Li, CB Leung, CC Szeto, KM Chow                            | 2006 | Asia          | Yes                              |
| Glom (IgAN)        | Praga 2003 <sup>14</sup> | Manuel Praga, Fernando Caravaca, Eduardo Gutierrez, Angel Sevillano | 2003                                                                      | Eur  | Yes           |                                  |
| RASB v CCB         | CKD (CNS)                | Zucchelli <sup>45</sup>                                             | Pietro Zucchelli                                                          | 1992 | NA, Eur, Aus  | Yes                              |
|                    | CKD (HTN)                | AASK <sup>10</sup>                                                  | Tom Greene                                                                | 2002 | NA, Eur, Aus  | Yes                              |
|                    | Diabetes                 | ABCD <sup>12</sup>                                                  | Robert W. Schrier, Raymond O. Estacio                                     | 2000 | NA, Eur, Aus  | Yes                              |
|                    | Diabetes (CKD)           | IDNT <sup>9</sup>                                                   | Julia B. Lewis, Jamie P. Dwyer, Edmund J. Lewis, Lawrence G. Hunsicker    | 2001 | International | Yes                              |
| Intensive BP       | CKD (CNS)                | MDRD Study B <sup>11</sup>                                          | Gerald J Beck, Tom Greene, John W. Kusek, Saulo Klahr                     | 1994 | NA, Eur, Aus  | Yes                              |
|                    | CKD (CNS)                | REIN 2 <sup>46</sup>                                                | Giuseppe Remuzzi, Piero Ruggenti                                          | 2005 | NA, Eur, Aus  | Yes                              |
|                    | CKD (CNS)                | MDRD Study A <sup>11</sup>                                          | Gerald J Beck, Tom Greene, John W. Kusek, Saulo Klahr                     | 1994 | NA, Eur, Aus  | Yes                              |
|                    | CKD (HTN)                | AASK <sup>10</sup>                                                  | Tom Greene                                                                | 2002 | NA, Eur, Aus  | Yes                              |
|                    | CKD (PKD)                | HALT-PKD A <sup>40</sup>                                            | Ronald D. Perrone, Kaleab Z. Abebe                                        | 2014 | NA            | No                               |
|                    | Diabetes                 | ABCD <sup>12</sup>                                                  | Robert W. Schrier, Raymond O. Estacio                                     | 2000 | NA, Eur, Aus  | Yes                              |
| Low Protein Diet   | CKD (CNS)                | MDRD Study A <sup>11</sup>                                          | Gerald J Beck, Tom Greene, John W. Kusek, Saulo Klahr                     | 1994 | NA, Eur, Aus  | Yes                              |
|                    | CKD (CNS)                | MDRD Study B <sup>11</sup>                                          | Gerald J Beck, Tom Greene, John W. Kusek, Saulo Klahr                     | 1994 | NA, Eur, Aus  | Yes                              |
| Immuno-suppression | Glom (IgAN)              | Pozzi 2012 <sup>24</sup>                                            | Francesco Locatelli, Lucia Del Vecchio, Simeone Andrulli, Claudio Pozzi   | 2012 | NA, Eur, Aus  | No                               |
|                    | Glom (IgAN)              | Donadio 2001 <sup>47</sup>                                          | James Donadio, Fernando Fervenza                                          | 2001 | NA, Eur, Aus  | Yes                              |
|                    | Glom (IgAN)              | Appel <sup>21</sup>                                                 | Gerald B. Appel, Gershon Frisch                                           | 2005 | NA, Eur, Aus  | Yes                              |

| Intervention | Disease        | Study Name                     | Collaborators                                                                  | Year | Region        | Creatinine calibration required* |
|--------------|----------------|--------------------------------|--------------------------------------------------------------------------------|------|---------------|----------------------------------|
|              | Glom (IgAN)    | STOP-IgAN <sup>48</sup>        | Jürgen Floege, Thomas Rauen, Christina Fitzner; Ralf-Dieter Hilgers            | 2015 | Eur           | No                               |
|              | Glom (IgAN)    | Maes <sup>20</sup>             | Bart Maes                                                                      | 2004 | Eur           | Yes                              |
|              | Glom (IgAN)    | Donadio 1999 <sup>49</sup>     | James Donadio, Fernando Fervenza                                               | 1999 | NA, Eur, Aus  | Yes                              |
|              | Glom (IgAN)    | Pozzi 2010 <sup>23</sup>       | Francesco Locatelli, Lucia Del Vecchio, Simeone Andrulli, Claudio Pozzi        | 2010 | NA, Eur, Aus  | Yes                              |
|              | Glom (IgAN)    | Pozzi 2004 <sup>22</sup>       | Francesco Locatelli, Lucia Del Vecchio, Simeone Andrulli, Claudio Pozzi        | 2004 | NA, Eur, Aus  | Yes                              |
|              | Glom (IgAN)    | Schena <sup>26</sup>           | Francesco Paolo Schena, Manno Carlo                                            | 2009 | Eur           | No                               |
|              | Glom (IgAN)    | Katafuchi <sup>25</sup>        | Ritsuko Katafuchi                                                              | 2003 | Asia          | Yes                              |
|              | Glom (Lupus)   | Lewis 1992 <sup>50</sup>       | Edmund Lewis, Roger A. Rodby, Richard D. Rohde, Julia B. Lewis                 | 1992 | NA, Eur, Aus  | Yes                              |
|              | Glom (Lupus)   | Chan <sup>51</sup>             | Tak-Mao Chan                                                                   | 2005 | Asia          | Yes                              |
|              | Glom (Membran) | Ponticelli 1998 <sup>18</sup>  | Claudio Ponticelli, Patrizia Passerini, Gabriella Moroni, Giuseppe Montogrino  | 1998 | NA, Eur, Aus  | Yes                              |
|              | Glom (Membran) | Ponticelli 1989 <sup>17</sup>  | Claudio Ponticelli, Patrizia Passerini, Gabriella Moroni, Giuseppe Montogrino  | 1989 | NA, Eur, Aus  | Yes                              |
|              | Glom (Membran) | Ponticelli 1992 <sup>19</sup>  | Claudio Ponticelli, Patrizia Passerini, Gabriella Moroni, Giuseppe Montogrino  | 1992 | NA, Eur, Aus  | Yes                              |
|              | Glom (Membran) | Praga 2007 <sup>52</sup>       | Manuel Praga, Fernando Caravaca, Eduardo Gutierrez, Angel Sevillano            | 2007 | Eur           | Yes                              |
|              | Glom (Membran) | Ponticelli 2006 <sup>16</sup>  | Claudio Ponticelli, Patrizia Passerini, Gabriella Moroni, Giuseppe Montogrino  | 2006 | NA, Eur, Aus  | Yes                              |
| Alb Protocol | CKD (CNS)      | ROAD <sup>53</sup>             | Fan Fan Hou                                                                    | 2007 | Asia          | Yes                              |
| Sulodexide   | Diabetes (CKD) | SUN-MACRO <sup>54</sup>        | Julia B. Lewis, Jamie P. Dwyer, Edmund J. Lewis                                | 2012 | International | Yes                              |
| EMPA         | Diabetes       | EMPA-REG OUTCOME <sup>55</sup> | Christoph Wanner, Maximilian von Eynatten                                      | 2010 | International | Yes                              |
| Allopurinol  | CKD (CNS)      | Goicoechea <sup>56</sup>       | Marian Goicoechea, Eduardo Verde, Ursula Verdalles, Jose Luño                  | 2015 | NA, Eur, Aus  | Yes                              |
| GLUC         | Diabetes       | ADVANCE <sup>57</sup>          | Vlado Perkovic                                                                 | 2008 | International | Yes                              |
| Nurse Care   | CKD (CNS)      | MASTERPLAN <sup>58</sup>       | Jack F.M. Wetzels, Peter J Blankestijn, Arjan D. van Zuilen, Jan van den Brand | 2014 | Eur           | Yes                              |
|              | CKD (CNS)      | CanPREVENT <sup>59</sup>       | Brendan Barret                                                                 | 2011 | NA, Eur, Aus  | No                               |
| Simva/Eze    | CKD (CNS)      | SHARP                          | Martin Landray, Will Herrington, Natalie Staplin, Colin Baigent                | 2011 | NA, Eur, Aus  | No                               |

\*If calibration required, creatinine was standardized to isotope dilution mass spectroscopy traceable reference methods using direct comparison or were reduced by 5% as has previously been described.<sup>60</sup>

## Supplemental Appendix 3: Analyses of previous studies

### Patient characteristics

The patient characteristics are summarized across the 47 randomized treatment group comparisons in **Supplemental Table 4**.

### Meta-analyses of key input parameters for the simulations.

We carried out meta-analyses or meta-regressions for the 47 randomized treatment group comparisons to establish ranges for evaluation for three key input parameters of the simulations: 1) The mean chronic slope in the control group; 2) The standard deviation of the chronic slope in the control group; 3) The mean acute effect of the treatment. The meta-analyses were applied to the results of analyses of GFR slope carried out separate for each randomized group comparison as described in the Inker *et al* paper.<sup>61</sup> Briefly, to maintain a consistent method of analysis across studies, these analyses were performed using a simplified linear mixed effects model based on a single slope starting at three months post randomization adjusted for baseline GFR. Under this model, the differences between the randomized groups in the mean intercepts (at 3 months follow-up), the mean slopes after 3 months, and the estimated mean changes from baseline to either 1, 2, 3 or 4 years follow-up factored by the follow-up duration represented the treatment effects on the acute, chronic, and total slopes. We accounted for between-subject variability in GFR trajectories with use of random slopes and intercepts; for greater variation in individual GFR measurements at higher GFR levels with the use of a power of the mean (POM) model; and for non-uniform effects in which treatments may have larger effects for patients with faster GFR decline than for patients with slower GFR decline by allowing different between-patient slope variances in the treatment and control groups.<sup>61</sup> In studies in which at least 15 subjects died or reached ESKD, we accounted for informative censoring resulting from these events by nesting the mixed model for the GFR measurements within a shared parameter model that also includes the event times.<sup>26,27</sup> Simplified models were used in cases where convergence could not be obtained with the full model. The full shared parameter mixed effects models were fit using the SAS (version 9.4) nonlinear mixed-effects regression procedure, NLMIXED.

After obtaining the results of the mixed effects analyses described above for each study, we then carried out mixed effects meta-analyses to estimate the mean and the standard deviation across studies in the mean and standard deviation of the chronic slope in the control group and the mean acute effect across the 47 randomized treatment comparisons. The results of these meta-analyses are provided in **Supplemental Table 5**.

### Meta-regression to evaluate the nature of the long-term treatment effect.

The potential gain in statistical power for GFR slope endpoints vs. the clinical endpoint is dependent on the nature of the long-term effects of the treatment on the chronic slope. If the treatment effect is uniform, leading to the same change in slope irrespective of the patients' underlying progression rate, statistical power for slope endpoints can be expected to be relative high compared to time-to-event endpoints since the analyses of mean slope incorporates data from all patients, including those with slow progression rates. By contrast, analyses of time-to-event endpoints censor those patients with relatively slow progression who do not reach events, and therefore do not account for information

provided by different rates of progression among patients not reaching events. On the other hand, if the effect of the treatment is proportional to the rate of GFR decline that would have occurred without the treatment, the size of the treatment effect will be larger in faster progressing patients than in more slowly progressing patients. In this case, the effect size for time-to-event outcomes tends to be amplified compared to the effect size for analyses of mean slope. This is because the effect size for the analysis of mean slope is attenuated by small effects on slowly progressing patients, whereas these patients are censored and thus do not contribute to the effect size for time-to-event outcomes.

By definition, proportional effects, but not uniform effects, attenuate the standard deviation (SD) as well as the mean of the GFR slopes. Hence, to evaluate if treatment effects are proportional or uniform, we applied a meta-regression analysis to relate the ratio of the chronic slope standard deviations to the ratio of mean chronic slopes between treatment and control groups across the 47 randomized treatment comparisons. The ratios of the means and standard deviations of the chronic slopes and their associated standard errors were first estimated within each study using the mixed effects models described above. We assumed that the sampling errors for the mean slopes and the standard deviations of the slopes were statistical independent within each study.

The results of the meta-regression are reported in **Supplemental Figure 1**. The figure shows that treatments that reduce the mean chronic slope also often reduce the slope SD, indicating that effective treatments tend to slow progression more in faster than in slower progressors. The intercept of the meta-regression line is approximately 0 and the slope of the meta-regression line is  $0.45 \pm 0.13$ , about half way between 0 (corresponding to uniform effects) and 1 (corresponding to proportional effects), suggesting treatment effects are usually roughly intermediate between uniform and proportional.



**Supplemental Table 4. Patient characteristics by study**

| <b>Intervention</b> | <b>Disease</b> | <b>Study</b> | <b>N</b>    | <b>Age</b>  | <b>Female</b> | <b>Black</b> | <b>Diabetes</b> | <b>eGFR</b>      | <b>ACR</b>        |
|---------------------|----------------|--------------|-------------|-------------|---------------|--------------|-----------------|------------------|-------------------|
| RASB v Control      | CKD (CNS)      | Kamper       | 55          | 49.8 (11.7) | 28 (50.9)     | 0 (0.0)      | 0 (0.0)         | 14.8 (9.0)       | 654 (264, 1558)   |
|                     | CKD (CNS)      | Ihle/Kincaid | 67          | 45.5 (12.8) | 34 (50.7)     | 0 (0.0)      | 0 (0.0)         | 16.5 (6.7)       | 856 (449, 1766)   |
|                     | CKD (CNS)      | Hou          | 224         | 44.7 (15.4) | 113 (50.4)    | 0 (0.0)      | 0 (0.0)         | 16.8 (4.4)       | 1012 (635, 1338)  |
|                     | CKD (CNS)      | Hannedouche  | 98          | 51.2 (14.1) | 47 (48.0)     | 0 (0.0)      | 0 (0.0)         | 23.4 (7.8)       | 958 (359, 1916)   |
|                     | CKD (CNS)      | Brenner      | 106         | 46.7 (13.2) | 38 (35.8)     | 37 (34.9)    | 0 (0.0)         | 35.4 (17.2)      | 747 (154, 1883)   |
|                     | CKD (CNS)      | Toto         | 122         | 52.4 (11.6) | 44 (36.1)     | 74 (60.7)    | 0 (0.0)         | 37.0 (17.5)      | 136 (60, 585)     |
|                     | CKD (CNS)      | AIPRI        | 562         | 50.9 (12.5) | 157 (27.9)    | 0 (0.0)      | 0 (0.0)         | 38.6 (11.6)      | 500 (78, 1473)    |
|                     | CKD (CNS)      | REIN         | 322         | 48.8 (13.6) | 73 (22.7)     | 2 (0.6)      | 0 (0.0)         | 41.5 (18.8)      | 1646 (916, 2599)  |
|                     | CKD (CNS)      | Van Essen    | 103         | 50.6 (12.9) | 35 (34.0)     | 1 (1.0)      | 0 (0.0)         | 48.1 (19.3)      | 299 (60, 1497)    |
|                     | CKD (HTN)      | AASK         | 876         | 54.6 (10.7) | 339 (38.7)    | 876 (100.0)  | 0 (0.0)         | 48.9 (15.8)      | 74 (26, 364)      |
|                     | CKD (PKD)      | HALT-PKD B   | 462         | 48.8 (8.2)  | 238 (51.5)    | 12 (2.6)     | 0 (0.0)         | 48.2 (11.8)      | 30 (17, 76)       |
|                     | CKD (PKD)      | HALT-PKD A   | 542         | 36.6 (8.3)  | 270 (49.8)    | 13 (2.4)     | 0 (0.0)         | 91.9 (17.7)      | 18 (12, 33)       |
|                     | Diabetes       | ALTITUDE     | 8150        | 64.4 (9.7)  | 2572 (31.6)   | 267 (3.3)    | 8150 (100.0)    | 58.4 (21.2)      | 284 (57, 881)     |
|                     | Diabetes       | ADVANCE      | 10876       | 65.7 (6.4)  | 4611 (42.4)   | 37 (0.3)     | 10876 (100.0)   | 78.3 (17.3)      | 15 (7, 40)        |
|                     | Diabetes (CKD) | RENAAL       | 1513        | 60.2 (7.4)  | 557 (36.8)    | 230 (15.2)   | 1513 (100.0)    | 41.3 (13.2)      | 1307 (616, 2732)  |
|                     | Diabetes (CKD) | ORIENT       | 566         | 59.2 (8.1)  | 175 (30.9)    | 0 (0.0)      | 566 (100.0)     | 47.5 (12.1)      | 1270 (617, 2285)  |
|                     | Diabetes (CKD) | IDNT         | 1135        | 58.8 (7.7)  | 363 (32.0)    | 139 (12.2)   | 1135 (100.0)    | 50.2 (19.5)      | 1816 (1051, 3234) |
|                     | Diabetes (CKD) | Lewis 1993   | 407         | 34.5 (7.6)  | 191 (46.9)    | 32 (7.9)     | 407 (100.0)     | 73.2 (25.3)      | 1111 (605, 2299)  |
| Glom (IgAN)         | HKVIN          | 109          | 40.5 (9.5)  | 79 (72.5)   | 0 (0.0)       | 3 (2.8)      | 75.1 (29.0)     | 958 (629, 1560)  |                   |
| Glom (IgAN)         | Praga 2003     | 44           | 31.6 (11.5) | 17 (38.6)   | 0 (0.0)       | 0 (0.0)      | 98.1 (26.5)     | 1018 (659, 1437) |                   |
| RASB v CCB          | CKD (CNS)      | Zucchelli    | 121         | 55.4 (10.9) | 47 (38.8)     | 0 (0.0)      | 0 (0.0)         | 24.9 (10.1)      | 599 (251, 1557)   |
|                     | CKD (HTN)      | AASK         | 652         | 54.4 (10.8) | 255 (39.1)    | 652 (100.0)  | 0 (0.0)         | 48.7 (15.8)      | 67 (25, 343)      |
|                     | Diabetes       | ABCD         | 392         | 59.0 (8.2)  | 130 (33.2)    | 63 (16.1)    | 392 (100.0)     | 72.1 (18.7)      | 127 (56, 661)     |
|                     | Diabetes (CKD) | IDNT         | 1128        | 59.2 (7.5)  | 400 (35.5)    | 147 (13.0)   | 1128 (100.0)    | 50.1 (18.7)      | 1740 (1009, 3059) |
| Intensive BP        | CKD (CNS)      | MDRD Study B | 255         | 50.8 (12.8) | 104 (40.8)    | 13 (5.1)     | 13 (5.1)        | 20.3 (5.8)       | 425 (102, 1222)   |
|                     | CKD (CNS)      | REIN 2       | 330         | 54.2 (14.9) | 82 (24.8)     | 0 (0.0)      | 17 (5.2)        | 32.3 (18.1)      | 1429 (906, 2194)  |
|                     | CKD (CNS)      | MDRD Study A | 584         | 52.2 (12.2) | 228 (39.0)    | 53 (9.1)     | 30 (5.1)        | 40.7 (11.0)      | 120 (33, 668)     |
|                     | CKD (HTN)      | AASK         | 1093        | 54.6 (10.7) | 425 (38.9)    | 1093 (100.0) | 0 (0.0)         | 48.7 (15.7)      | 70 (25, 349)      |
|                     | CKD (PKD)      | HALT-PKD A   | 542         | 36.6 (8.3)  | 270 (49.8)    | 13 (2.4)     | 0 (0.0)         | 91.9 (17.7)      | 18 (12, 33)       |
|                     | Diabetes       | ABCD         | 392         | 59.0 (8.2)  | 130 (33.2)    | 63 (16.1)    | 392 (100.0)     | 72.1 (18.7)      | 127 (56, 661)     |
| Low Protein Diet    | CKD (CNS)      | MDRD Study B | 255         | 50.8 (12.8) | 104 (40.8)    | 13 (5.1)     | 13 (5.1)        | 20.3 (5.8)       | 425 (102, 1222)   |
|                     | CKD (CNS)      | MDRD Study A | 584         | 52.2 (12.2) | 228 (39.0)    | 53 (9.1)     | 30 (5.1)        | 40.7 (11.0)      | 120 (33, 668)     |
|                     | Glom (IgAN)    | Pozzi 2012   | 46          | 42.0 (11.5) | 9 (19.6)      | 0 (0.0)      | 0 (0.0)         | 27.8 (7.0)       | 1497 (898, 2395)  |

|                   |                 |                 |             |             |             |            |               |                   |                   |
|-------------------|-----------------|-----------------|-------------|-------------|-------------|------------|---------------|-------------------|-------------------|
| Immunosuppression | Glom (IgAN)     | Donadio 2001    | 72          | 46.3 (13.1) | 13 (18.1)   | 2 (2.8)    | 0 (0.0)       | 40.8 (14.4)       | 971 (441, 1886)   |
|                   | Glom (IgAN)     | Appel           | 29          | 37.9 (12.3) | 5 (17.2)    | 0 (0.0)    | 0 (0.0)       | 42.2 (26.6)       | 1371 (982, 1976)  |
|                   | Glom (IgAN)     | STOP-IgAN       | 151         | 44.2 (12.4) | 34 (22.5)   | 0 (0.0)    | 0 (0.0)       | 59.7 (27.6)       | 928 (641, 1229)   |
|                   | Glom (IgAN)     | Maes            | 34          | 44.8 (11.3) | 10 (29.4)   | 0 (0.0)    | 0 (0.0)       | 62.2 (18.9)       | 596 (353, 1599)   |
|                   | Glom (IgAN)     | Donadio 1999    | 96          | 38.5 (13.4) | 26 (27.1)   | 0 (0.0)    | 0 (0.0)       | 66.1 (22.5)       | 1257 (719, 2066)  |
|                   | Glom (IgAN)     | Pozzi 2010      | 197         | 39.2 (12.6) | 55 (27.9)   | 0 (0.0)    | 0 (0.0)       | 74.7 (25.5)       | 1198 (898, 1617)  |
|                   | Glom (IgAN)     | Pozzi 2004      | 83          | 38.6 (11.7) | 25 (30.1)   | 0 (0.0)    | 0 (0.0)       | 87.2 (21.6)       | 1138 (838, 1437)  |
|                   | Glom (IgAN)     | Schena          | 95          | 33.7 (11.1) | 29 (30.5)   | 0 (0.0)    | 2 (2.1)       | 91.3 (23.7)       | 982 (790, 1497)   |
|                   | Glom (IgAN)     | Katafuchi       | 81          | 35.6 (11.2) | 48 (59.3)   | 0 (0.0)    | 0 (0.0)       | 98.8 (21.4)       | 797 (563, 1543)   |
|                   | Glom (Lupus)    | Lewis 1992      | 79          | 32.6 (12.0) | 66 (83.5)   | 17 (21.5)  | 0 (0.0)       | 56.4 (36.3)       | 2635 (1165, 4905) |
|                   | Glom (Lupus)    | Chan            | 61          | 40.1 (9.9)  | 51 (83.6)   | 0 (0.0)    | 2 (3.3)       | 70.4 (26.3)       | 2359 (1557, 4216) |
|                   | Glom (Membran)  | Ponticelli 1998 | 91          | 49.9 (10.7) | 28 (30.8)   | 0 (0.0)    | 0 (0.0)       | 82.5 (19.9)       | 3293 (2395, 5210) |
|                   | Glom (Membran)  | Ponticelli 1989 | 75          | 44.4 (10.9) | 15 (20.0)   | 0 (0.0)    | 0 (0.0)       | 87.7 (23.0)       | 2874 (2275, 4731) |
|                   | Glom (Membran)  | Ponticelli 1992 | 76          | 46.7 (13.3) | 26 (34.2)   | 0 (0.0)    | 0 (0.0)       | 89.0 (25.1)       | 3234 (2455, 4641) |
|                   | Glom (Membran)  | Praga 2007      | 48          | 46.6 (12.5) | 8 (16.7)    | 0 (0.0)    | 0 (0.0)       | 89.3 (20.2)       | 4338 (2640, 5828) |
| Glom (Membran)    | Ponticelli 2006 | 31              | 49.3 (10.5) | 12 (38.7)   | 0 (0.0)     | 0 (0.0)    | 92.6 (22.2)   | 3353 (2395, 4850) |                   |
| Alb Protocol      | CKD (CNS)       | ROAD            | 339         | 50.9 (13.7) | 126 (37.2)  | 0 (0.0)    | 0 (0.0)       | 29.0 (13.4)       | 958 (641, 1599)   |
| Sulodexide        | Diabetes (CKD)  | SUN-MACRO       | 1110        | 63.5 (9.3)  | 256 (23.1)  | 115 (10.4) | 1110 (100.0)  | 33.7 (9.7)        | 1075 (569, 1798)  |
| EMPA              | Diabetes        | EMPA-REG        | 6936        | 63.2 (8.6)  | 1977 (28.5) | 354 (5.1)  | 6936 (100.0)  | 76.2 (19.9)       | 18 (7, 72)        |
| Allopurinol       | CKD (CNS)       | Goicoechea      | 113         | 71.8 (8.7)  | 40 (35.4)   | 0 (0.0)    | 42 (37.2)     | 40.5 (12.4)       | 35 (15, 362)      |
| GLUC              | Diabetes        | ADVANCE         | 10876       | 65.7 (6.4)  | 4611 (42.4) | 37 (0.3)   | 10876 (100.0) | 78.3 (17.3)       | 15 (7, 40)        |
| Nurse Care        | CKD (CNS)       | MASTERPLAN      | 640         | 60.5 (12.5) | 199 (31.1)  | 49 (7.7)   | 156 (24.4)    | 36.7 (15.4)       | 147 (51, 449)     |
|                   | CKD (CNS)       | CanPREVENT      | 458         | 65.1 (7.5)  | 250 (54.6)  | 25 (5.5)   | 144 (31.4)    | 47.6 (9.9)        | 72 (48, 115)      |
| Simva/Eze         | CKD (CNS)       | SHARP           | 6245        | 62.9 (11.7) | 2363 (37.8) | 119 (1.9)  | 1426 (22.8)   | 26.2 (12.3)       | 206 (44, 762)     |
| Pooled studies    | Glom (IgAN)     | IgAN-ACEI       | 153         | 37.9 (10.8) | 96 (62.7)   | 0 (0.0)    | 3 (2.0)       | 81.7 (30.1)       | 958 (659, 1497)   |
|                   | Glom (IgAN)     | IgAN-MMF        | 63          | 41.6 (12.2) | 15 (23.8)   | 0 (0.0)    | 0 (0.0)       | 53.0 (24.7)       | 1078 (497, 1946)  |
|                   | Glom (IgAN)     | IgAN-AZA        | 243         | 39.8 (12.4) | 64 (26.3)   | 0 (0.0)    | 0 (0.0)       | 65.8 (29.5)       | 1198 (898, 1737)  |
|                   | Glom (IgAN)     | IgAN-steroid    | 259         | 35.9 (11.5) | 102 (39.4)  | 0 (0.0)    | 2 (0.8)       | 92.3 (22.7)       | 1018 (726, 1497)  |
|                   | Glom (Membran)  | Mem-Ponticelli  | 273         | 47.4 (11.7) | 81 (29.7)   | 0 (0.0)    | 0 (0.0)       | 86.9 (22.7)       | 3174 (2395, 4790) |

Note: Values for categorical variables are given as number (percentage); values for continuous variables, as mean (standard deviation). The number of participants refers to those included in the GFR analysis. Participants with missing data on age, race, sex, serum creatinine, urine albumin were excluded.

**Supplemental Table 5: Distribution of key input parameters for statistical simulations**

| Parameter                                                                 | Mean (SE)    | SD (SE)     |
|---------------------------------------------------------------------------|--------------|-------------|
| Acute Effect (mL/min/1.73m <sup>2</sup> )                                 | 0.19 (0.23)  | 1.27 (0.19) |
| Acute Effect Normed to a GFR of 42.5 mL/min/1.73m <sup>2</sup> *          | 0.15 (0.18)  | 1.01 (0.15) |
| Standard Deviation of Chronic GFR Slope (mL/min/1.73m <sup>2</sup> /year) | 3.89 (0.22)  | 1.43 (0.18) |
| Mean GFR Slope in Control Group (mL/min/1.73m <sup>2</sup> /year)         | -3.54 (0.26) | 1.73 (0.20) |

\* Normalized acute effects were expressed relative to a GFR of 42.5 mL/min/1.73m<sup>2</sup> assuming acute effects are linearly related to the GFR level and attenuate to 0 when GFR is  $\leq 15$  mL/min/1.73m<sup>2</sup>.

**Supplemental Figure 1. Meta-regression relating ratios of slope standard deviations to ratios of mean chronic slopes between treatment and control groups**

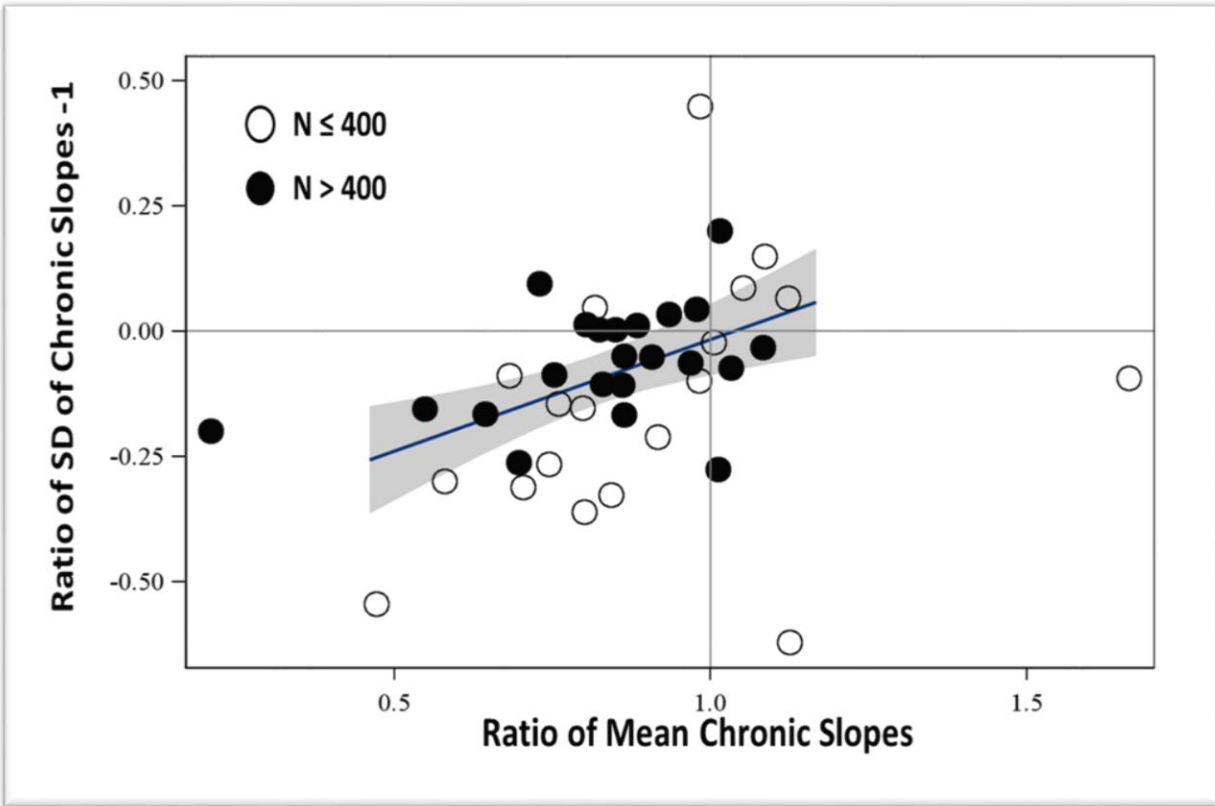

The vertical axis indicates the difference between the ratio between treatment and control groups in the standard deviations of the chronic slopes and 1 and the horizontal axis indicates the ratio of mean chronic slopes between the treatment and control groups. This data points represent individual randomized treatment comparisons across different trials, with closed circles representing trials with greater than 400 subjects and open circles representing smaller trials. The meta-regression line relating these variables across the 47 randomized treatment comparisons is displayed with its 95% pointwise confidence band. The slope (and standard error) of the meta-regression line is 0.45 (0.13). This indicates that a reduction of the ratio of mean chronic slopes by 0.10 is associated with a reduction in the ratio of standard deviations by 0.045 (0.013).

**Supplemental Table 6A: Gains in efficiency (with simulation standard errors in parentheses) for the total slope compared to the clinical outcome when the long-term treatment effect is intermediate between uniform and proportional and there is no acute effect**

| Mean Baseline GFR (mL/min/1.73m <sup>2</sup> ) | Mean Slope (mL/min/1.73m <sup>2</sup> /year) | No Acute Effect                                                  |                                                                    |                                                                  |                                                   |
|------------------------------------------------|----------------------------------------------|------------------------------------------------------------------|--------------------------------------------------------------------|------------------------------------------------------------------|---------------------------------------------------|
|                                                |                                              | Relative Efficiency of the Total Slope vs. the Clinical Endpoint |                                                                    |                                                                  | Required N for Clinical Outcome in a 4-6 Year RCT |
|                                                |                                              | Total Slope in 2 Year RCT vs. Clinical Outcome in 4-6 Year RCT   | Total Slope in 2.5-4 Year RCT vs. Clinical Outcome in 4-6 Year RCT | Total Slope in 4-6 Year RCT vs. Clinical Outcome in 4-6 Year RCT |                                                   |
| 27.5                                           | -1.5                                         | 1.14 (0.016)                                                     | 1.16 (0.014)                                                       | 1.07 (0.015)                                                     | 4,980                                             |
|                                                | -3.25                                        | 1.51 (0.016)                                                     | 1.64 (0.016)                                                       | 1.58 (0.016)                                                     | 2,170                                             |
|                                                | -5                                           | 1.24 (0.016)                                                     | 1.29 (0.017)                                                       | 1.40 (0.025)                                                     | 870                                               |
| 42.5                                           | -1.5                                         | 0.71 (0.021)                                                     | 1.20 (0.014)                                                       | 1.11 (0.014)                                                     | 4,130                                             |
|                                                | -3.25                                        | 1.41 (0.019)                                                     | 1.39 (0.014)                                                       | 1.71 (0.013)                                                     | 1,750                                             |
|                                                | -5                                           | 1.17 (0.018)                                                     | 1.56 (0.014)                                                       | 1.61 (0.014)                                                     | 830                                               |
| 67.5                                           | -1.5                                         | 1.06 (0.018)                                                     | 1.66 (0.015)                                                       | 1.83 (0.013)                                                     | 6,090                                             |
|                                                | -3.25                                        | 1.28 (0.018)                                                     | 2.07 (0.016)                                                       | 2.16 (0.015)                                                     | 2,480                                             |
|                                                | -5                                           | 1.63 (0.017)                                                     | 2.34 (0.016)                                                       | 2.42 (0.014)                                                     | 1,310                                             |

All calculations assume a 25% intermediate long term effect.

Relative efficiencies are given by the ratio of sample size (N) for the clinical endpoint over 4-6 years vs. the slope analysis over the indicated follow-up period. Relative efficiencies > 1 indicate that a smaller sample size is required to achieve the same statistical power with the slope outcome over the indicated follow-up period compared to the clinical endpoint over 4-6 years.

**Supplemental Table 6B: Gains in efficiency (with simulation standard errors in parentheses) for total slope and chronic slope compared to the clinical outcome when the long-term treatment effect is intermediate between uniform and proportional and there is a moderate negative acute effect**

| Mean Baseline GFR (mL/min/1.73m <sup>2</sup> ) | Mean Slope (mL/min/1.73m <sup>2</sup> /year) | Relative Efficiency of the Total Slope vs. the Clinical Endpoint |                                                                    |                                                                  | Relative Efficiency of the Chronic Slope vs. the Clinical Endpoint |                                                                      |                                                                    | Required N for Clinical Outcome in a 4-6 Year RCT |
|------------------------------------------------|----------------------------------------------|------------------------------------------------------------------|--------------------------------------------------------------------|------------------------------------------------------------------|--------------------------------------------------------------------|----------------------------------------------------------------------|--------------------------------------------------------------------|---------------------------------------------------|
|                                                |                                              | Total Slope in 2 Year RCT vs. Clinical Outcome in 4-6 Year RCT   | Total Slope in 2.5-4 Year RCT vs. Clinical Outcome in 4-6 Year RCT | Total Slope in 4-6 Year RCT vs. Clinical Outcome in 4-6 Year RCT | Chronic Slope in 2 Year RCT vs. Clinical Outcome in 4-6 Year RCT   | Chronic Slope in 2.5-4 Year RCT vs. Clinical Outcome in 4-6 Year RCT | Chronic Slope in 4-6 Year RCT vs. Clinical Outcome in 4-6 Year RCT |                                                   |
| 27.5                                           | -1.5                                         | 0.37<br>(0.017)                                                  | 0.84<br>(0.014)                                                    | 0.41<br>(0.022)                                                  | 1.27<br>(0.018)                                                    | 1.62<br>(0.015)                                                      | 0.76<br>(0.022)                                                    | 7,140                                             |
|                                                | -3.25                                        | 0.82<br>(0.016)                                                  | 1.33<br>(0.015)                                                    | 1.49<br>(0.016)                                                  | 1.29<br>(0.018)                                                    | 1.69<br>(0.016)                                                      | 1.81<br>(0.017)                                                    | 2,190                                             |
|                                                | -5                                           | 1.13<br>(0.016)                                                  | 1.25<br>(0.017)                                                    | 1.53<br>(0.024)                                                  | 1.32<br>(0.018)                                                    | 1.40<br>(0.018)                                                      | 1.77<br>(0.024)                                                    | 960                                               |
| 42.5                                           | -1.5                                         | 0.28<br>(0.020)                                                  | 0.15<br>(0.014)                                                    | 0.39<br>(0.013)                                                  | 0.71<br>(0.022)                                                    | 1.38<br>(0.015)                                                      | 1.68<br>(0.013)                                                    | 5,010                                             |
|                                                | -3.25                                        | 0.26<br>(0.020)                                                  | 0.73<br>(0.014)                                                    | 1.23<br>(0.013)                                                  | 1.13<br>(0.023)                                                    | 1.70<br>(0.015)                                                      | 2.32<br>(0.013)                                                    | 1,940                                             |
|                                                | -5                                           | 0.64<br>(0.017)                                                  | 1.05<br>(0.014)                                                    | 1.59<br>(0.014)                                                  | 1.26<br>(0.020)                                                    | 1.77<br>(0.015)                                                      | 2.33<br>(0.014)                                                    | 930                                               |
| 67.5                                           | -1.5                                         | 0.46<br>(0.017)                                                  | 0.46<br>(0.016)                                                    | 0.46<br>(0.013)                                                  | 1.18<br>(0.020)                                                    | 2.09<br>(0.017)                                                      | 2.83<br>(0.013)                                                    | 8,240                                             |
|                                                | -3.25                                        | 0.16<br>(0.018)                                                  | 0.17<br>(0.016)                                                    | 0.69<br>(0.013)                                                  | 1.42<br>(0.021)                                                    | 2.41<br>(0.017)                                                      | 3.65<br>(0.013)                                                    | 2,940                                             |
|                                                | -5                                           | 0.09<br>(0.017)                                                  | 0.70<br>(0.016)                                                    | 1.25<br>(0.013)                                                  | 1.36<br>(0.020)                                                    | 2.64<br>(0.016)                                                      | 3.29<br>(0.013)                                                    | 1,260                                             |

All calculations assume a 25% intermediate long term effect.

Relative efficiencies are given by the ratio of sample size (N) for the clinical endpoint over 4-6 years vs. the slope analysis over the indicated follow-up period. Relative efficiencies > 1 indicate that a smaller sample size is required to achieve the same statistical power with the slope outcome over the indicated follow-up period compared to the clinical endpoint over 4-6 years.

Use of the chronic slope may incur an inflated risk of a false positive conclusion when the acute effect is negative.

## Supplemental Appendix 4: Legends for supplemental figures

### **Supplemental Figure 2. Relationship of relative efficiency of alternative endpoints vs. type of long-term treatment effect when there is no acute effect and mean GFR decline is fast**

Shown are the relative efficiencies of the alternative endpoints compared to the clinical endpoint when the mean GFR slope in the control group is fast ( $-5 \text{ mL/min/1.73m}^2/\text{year}$ ). Relative efficiencies greater than 1 indicate higher power for the alternative endpoint than the clinical endpoint. Within each panel, relative efficiencies are provided for uniform, intermediate and proportional long-term treatment effects. The panels correspond to trials in which the mean baseline GFR is low ( $27.5 \text{ mL/min/1.73m}^2$ ; top panels), intermediate ( $42.5 \text{ mL/min/1.73m}^2$ ; middle panels), or high ( $67.5 \text{ mL/min/1.73m}^2$ ; bottom panels), with either short (2 years; left panels), medium (2.5-4 years; middle panels), or long (4-6 years, right panels) follow-up. Relative efficiencies could not be accurately computed for trials with high baseline GFR and 2 years of follow-up due to insufficient events for the clinical endpoint.

### **Supplemental Figure 3. Required total sample size of alternative endpoints when the long-term treatment effect is fully proportional and there is no acute effect**

Shown are the total sample sizes in both the treatment and control groups combined required to obtain 90% power with 2-sided  $\alpha=0.05$  to detect a 25% reduction in the rate of ESKD when the analysis is based on the indicated endpoints and the long term treatment effect is fully proportional. Within each panel, the required sample sizes are provided for slow ( $-1.5 \text{ mL/min/1.73m}^2/\text{year}$ ), intermediate ( $-3.25 \text{ mL/min/1.73m}^2/\text{year}$ ) or fast ( $-5.0 \text{ mL/min/1.73m}^2/\text{year}$ ) mean rates of GFR decline. The panels correspond to trials in which the mean baseline GFR is low ( $27.5 \text{ mL/min/1.73m}^2$ ; top panels), intermediate ( $42.5 \text{ mL/min/1.73m}^2$ ; middle panels), or high ( $67.5 \text{ mL/min/1.73m}^2$ ; bottom panels), with either short (2 years; left panels), medium (2.5-4 years; middle panels), or long (4-6 years, right panels) follow-up. Required sample sizes greater than 12,800 are indicated by open circles. All required sample sizes assume there is no acute effect.

### **Supplemental Figure 4: Required total sample size of alternative endpoints when the long-term treatment effect is intermediate between proportional and uniform and there is moderate negative acute effect which attenuates**

Shown are the total sample sizes in both the treatment and control groups combined required to obtain 90% power with 2-sided  $\alpha=0.05$  to detect a 25% reduction in the rate of ESKD when the analysis is based on the indicated endpoints and the long term treatment effect is intermediate between proportional and uniform and there is moderate negative acute effect which attenuates. The size of the negative acute effect is assumed to be greater at higher levels of GFR such that the acute effect fully attenuates by the time GFR declines to  $15 \text{ mL/min/1.73m}^2$ . Within each panel, the required sample sizes are provided for slow ( $-1.5 \text{ mL/min/1.73m}^2/\text{year}$ ), intermediate ( $-3.25 \text{ mL/min/1.73m}^2/\text{year}$ ) or fast ( $-5.0 \text{ mL/min/1.73m}^2/\text{year}$ ) mean rates of GFR decline. The panels correspond to trials in which the mean baseline GFR is low ( $27.5 \text{ mL/min/1.73m}^2$ ; top panels), intermediate ( $42.5 \text{ mL/min/1.73m}^2$ ; middle panels), or high ( $67.5 \text{ mL/min/1.73m}^2$ ; bottom panels), with either short (2 years; left panels), medium

(2.5-4 years; middle panels), or long (4-6 years, right panels) follow-up. Required sample sizes greater than 12,800 are indicated by open circles.

**Supplemental Figure 5: Required total sample size of alternative endpoints when the long-term treatment effect is intermediate between proportional and uniform and there is moderate negative acute effect which does not attenuate**

Shown are the total sample sizes in both the treatment and control groups combined required to obtain 90% power with 2-sided  $\alpha=0.05$  to detect a 25% reduction in the rate of ESKD when the analysis is based on the indicated endpoints and the long term treatment effect is intermediate between proportional and uniform and there is moderate negative acute effect which attenuates. The size of the negative acute effect is assumed to be the same at all GFR levels so that the acute effect does not attenuate as GFR declines. Within each panel, the required sample sizes are provided for slow (-1.5 mL/min/1.73m<sup>2</sup>/year), intermediate (-3.25 mL/min/1.73m<sup>2</sup>/year) or fast (-5.0 mL/min/1.73m<sup>2</sup>/ year) mean rates of GFR decline. The panels correspond to trials in which the mean baseline GFR is low (27.5 mL/min/1.73m<sup>2</sup>; top panels), intermediate (42.5 mL/min/1.73m<sup>2</sup>; middle panels), or high (67.5 mL/min/1.73m<sup>2</sup>; bottom panels), with either short (2 years; left panels), medium (2.5-4 years; middle panels), or long (4-6 years, right panels) follow-up. Required sample sizes greater than 12,800 are indicated by open circles.

**Supplemental Figure 6. Relationship of relative efficiency of alternative endpoints vs. standard deviation of GFR slopes when there is no acute effect and the long-term treatment effect is intermediate between proportional and uniform**

Shown are the relative efficiencies of the alternative endpoints compared to the clinical endpoint when the mean GFR slope in the control group is moderate (-3.25 mL/min/1.73m<sup>2</sup>/year) and the long-term treatment effect is intermediate between proportional and uniform. Relative efficiencies greater than 1 indicate higher power for the alternative endpoint than the clinical endpoint. Within each panel, the standard deviation of the chronic slopes is plotted on the x-axis. The panels correspond to trials in which the mean baseline GFR is low (27.5 mL/min/1.73m<sup>2</sup>; top panels), intermediate (42.5 mL/min/1.73m<sup>2</sup>; middle panels), or high (67.5 mL/min/1.73m<sup>2</sup>; bottom panels), with either short (2 years; left panels), medium (2.5-4 years; middle panels), or long (4-6 years, right panels) follow-up.

**Supplemental Figure 7. Bias and risk of false positive and false negative conclusions when there is no long-term treatment effect and follow-up time is short**

The top panels display the effects of the treatment on the mean total slope to 2 years (left) and the mean chronic slope (right) as a function of the acute effect on the horizontal axis when the acute effect is assumed to increase linearly from 0 at 15 mL/min/1.73m<sup>2</sup> to the values indicated on the horizontal axis at a GFR of 42.5 mL/min/1.73m<sup>2</sup> and follow-up is short (2 years). The acute effects are then assumed to attenuate linearly as GFR declines during subsequent follow-up, with complete attenuation reached at a GFR of 15 mL/min/1.73m<sup>2</sup>. Because there is no effect of the treatment on the time to ESKD or death, any non-zero effects represent a bias relative to the treatment effect on the clinical endpoint. The bottom panels indicate the implications of these biases for the risk of false conclusions of treatment



benefit or of treatment harm. The mean baseline GFR was assumed to be intermediate (42.5 mL/min/1.73m<sup>2</sup>).

**Supplemental Figure 8. Bias and risk of false positive and false negative conclusions when there is no long-term treatment effect and follow-up time is long**

The top panels display the effects of the treatment on the mean total slope to 4 years (left) and the mean chronic slope (right) as a function of the acute effect on the horizontal axis when the acute effect is assumed to increase linearly from 0 at 15 mL/min/1.73m<sup>2</sup> to the values indicated on the horizontal axis at a GFR of 42.5 mL/min/1.73m<sup>2</sup> and follow-up is long (4-6 years). The acute effects are then assumed to attenuate linearly as GFR declines during subsequent follow-up, with complete attenuation reached at a GFR of 15 mL/min/1.73m<sup>2</sup>. Because there is no effect of the treatment on the time to ESKD or death, any non-zero effects represent a bias relative to the treatment effect on the clinical endpoint. The bottom panels indicate the implications of these biases for the risk of false conclusions of treatment benefit or of treatment harm. The mean baseline GFR was assumed to be intermediate (42.5 mL/min/1.73m<sup>2</sup>).

**Supplemental Figure 9: Estimated treatment effects on the chronic and total slopes when there is no long-term treatment effect and follow-up time is intermediate, and the acute effect does not attenuate**

The top panels display the effects of the treatment on the mean total slope to 3 years (left) and the mean chronic slope (right) as a function of the acute effect on the horizontal axis when the acute effect does not attenuate and follow-up is medium (2.5 - 4 years). The acute effect is assumed to be the same irrespective of the GFR level. No long-term effect of the treatment is assumed. In this setting, the acute effect does not attenuate, and treatment effects on the total slope represent true benefit or harm even though there is no treatment effect on the chronic slope. The bottom level panel shows the probabilities that an analysis of the total slope would infer benefit or harm when the total sample size is 1,000. The bottom right panel shows that the chronic slope as a probability of 0.025 of inferring either benefit or harm in this situation, corresponding to half the 2-sided  $\alpha$ -level.

Supplemental Figure 2: Relationship of relative efficiency of alternative endpoints vs. type of long-term treatment effect when there is no acute effect and progression is fast

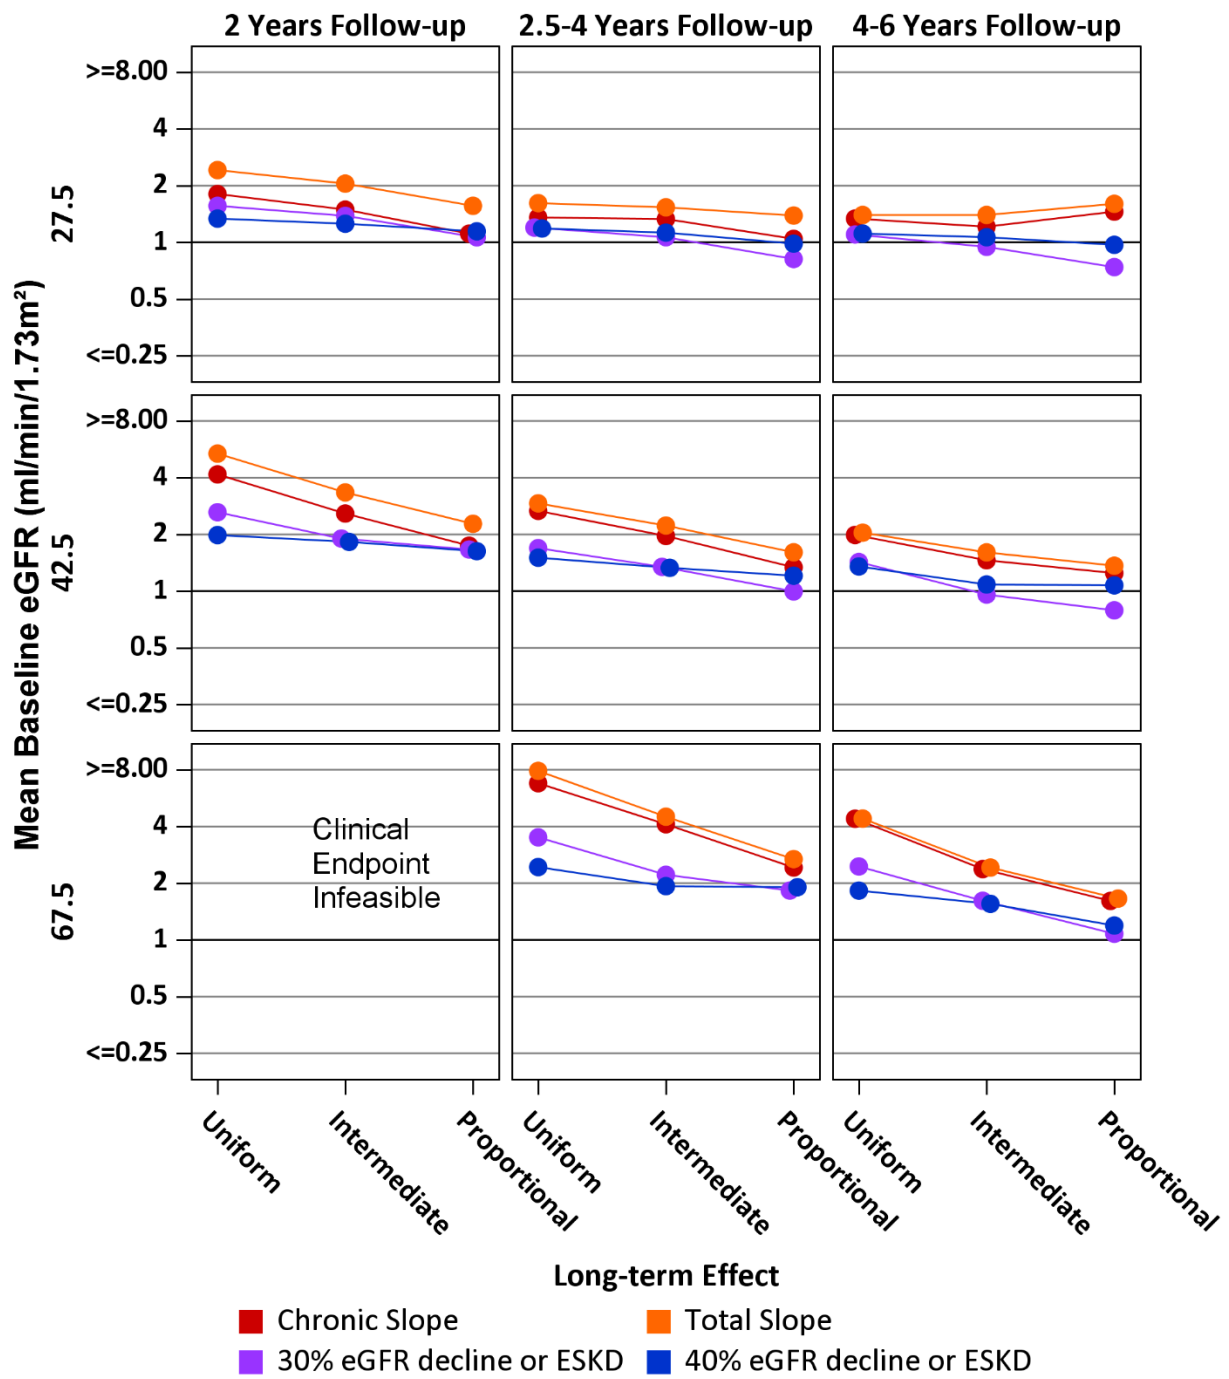

Supplemental Figure 3: Required total sample size of alternative endpoints when the long-term treatment effect is fully proportional and there is no acute effect

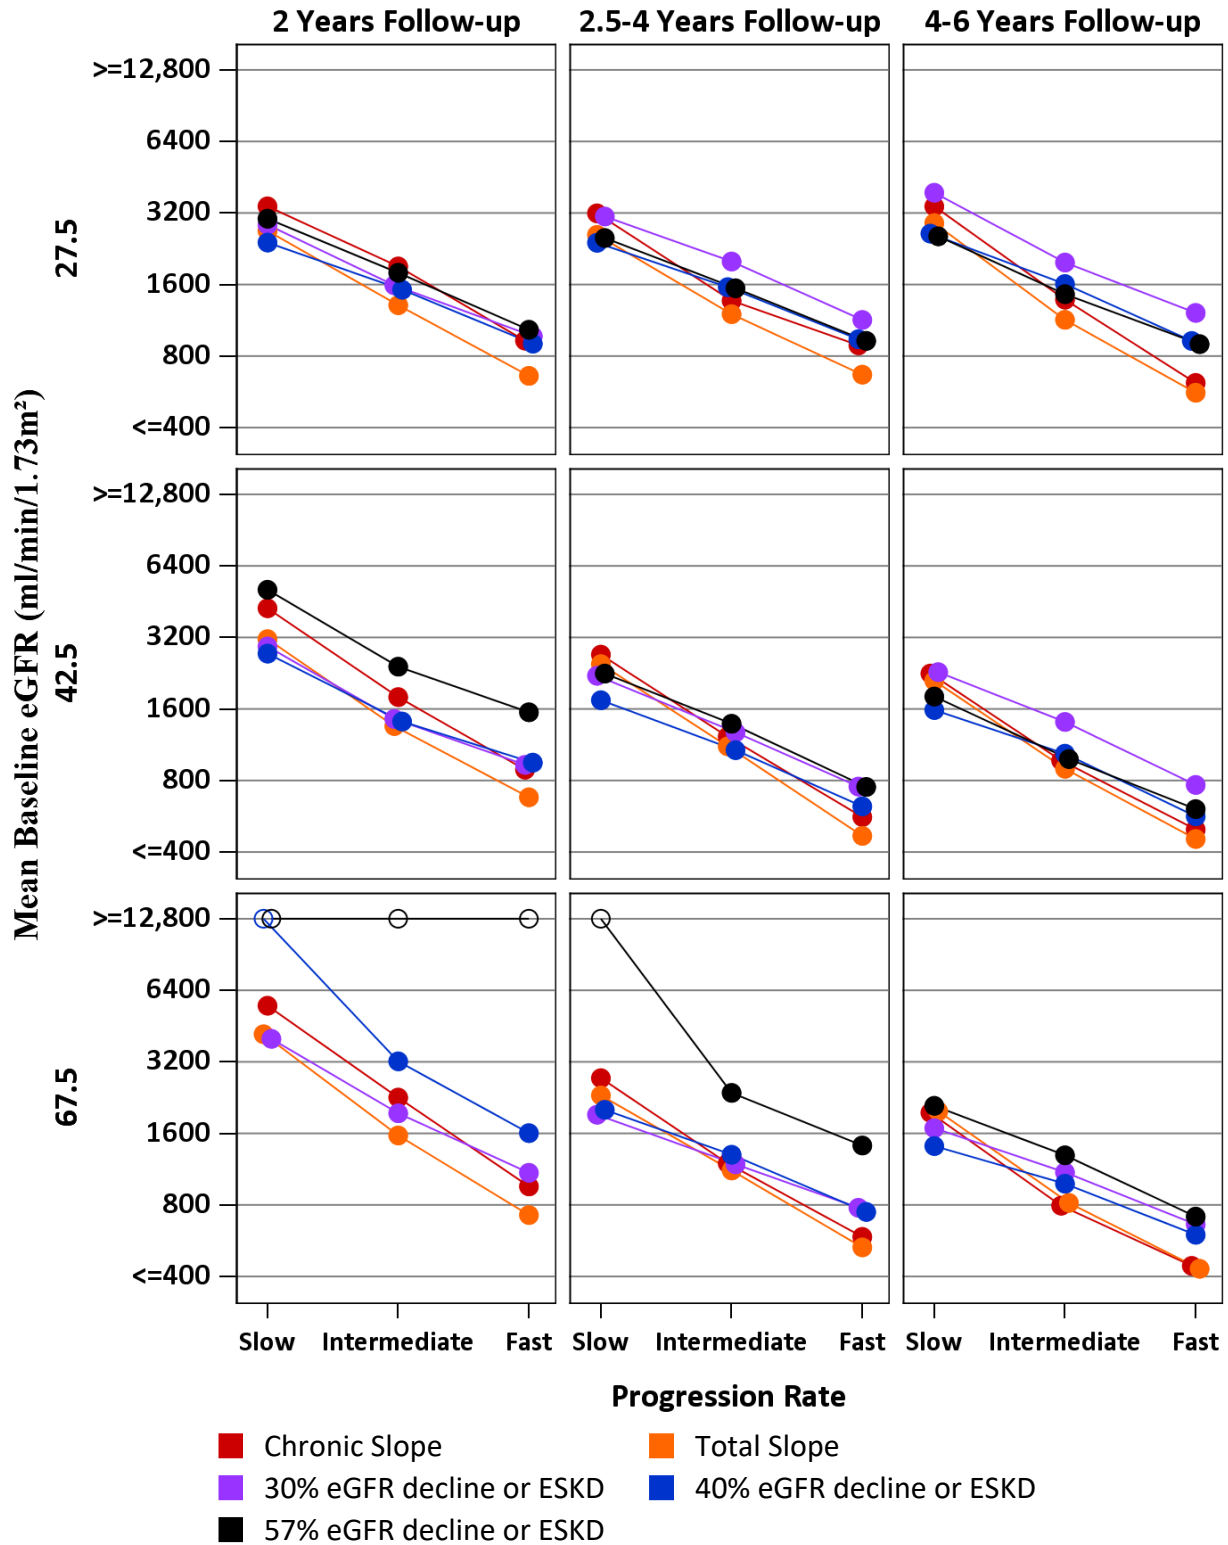

Supplemental Figure 4: Required total sample size of alternative endpoints when the long-term treatment effect is intermediate between proportional and uniform and there is moderate negative acute effect which attenuates

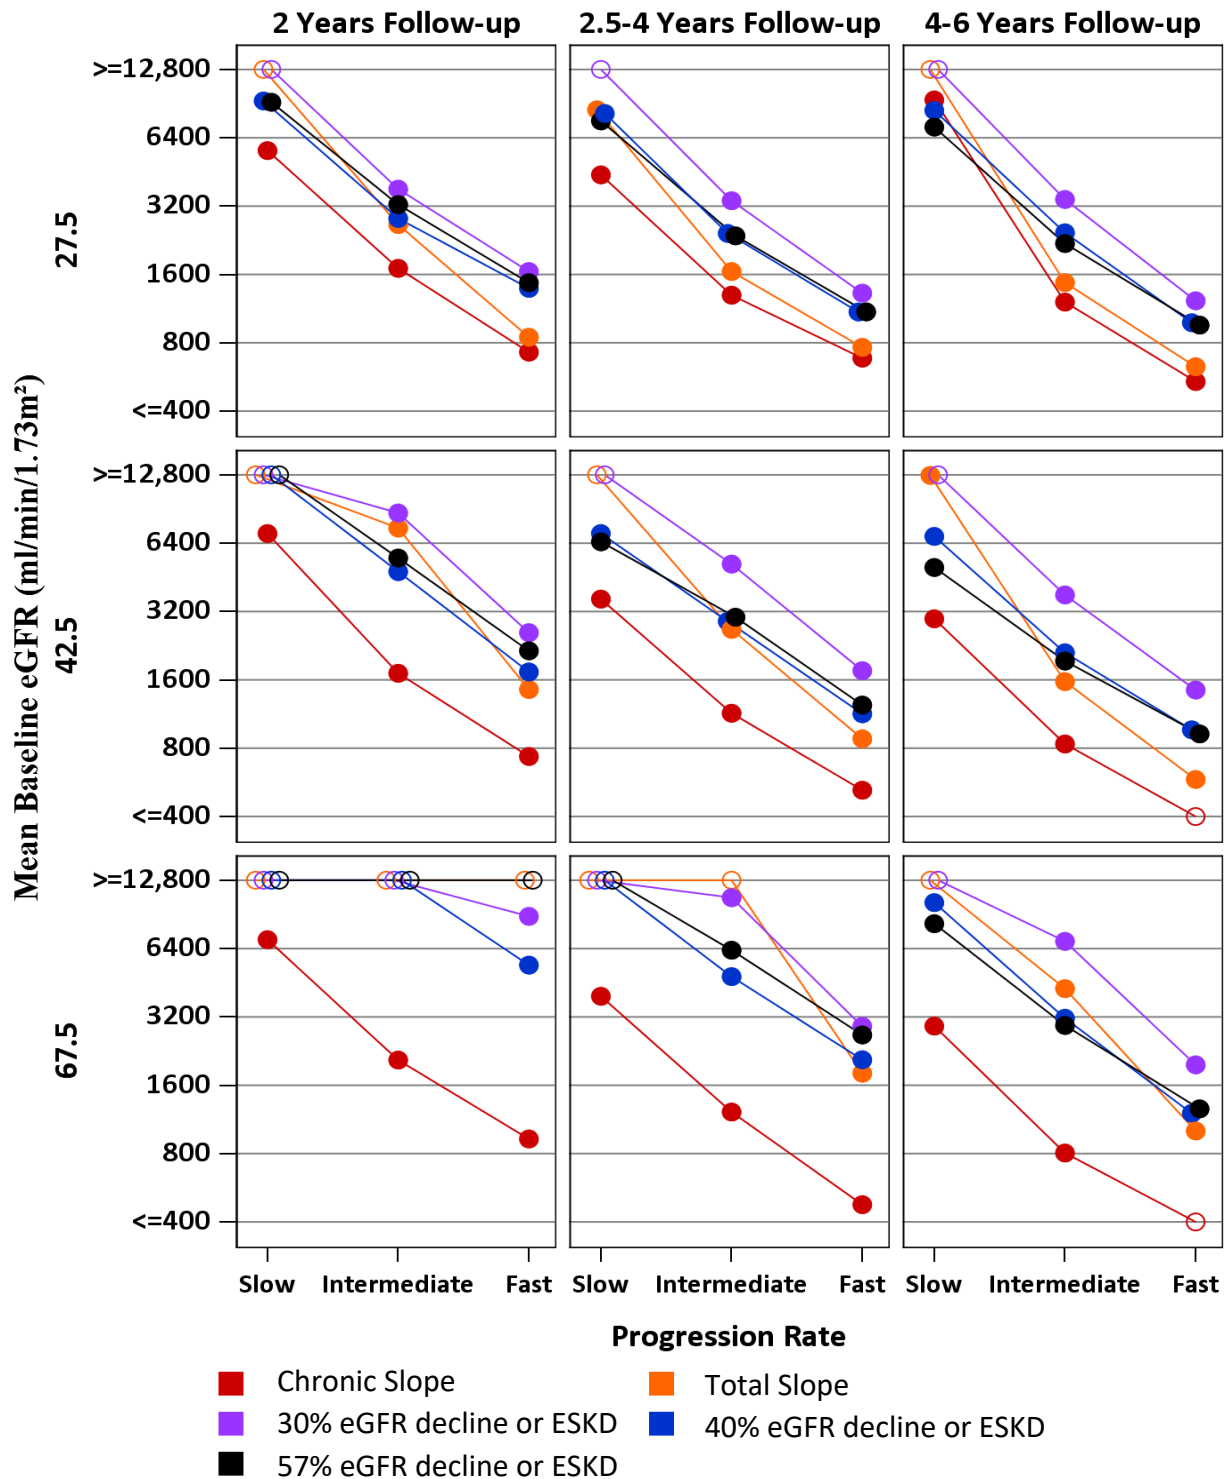

Supplemental Figure 5: Required total sample size of alternative endpoints when the long-term treatment effect is intermediate between proportional and uniform and there is moderate negative acute effect which does not attenuate

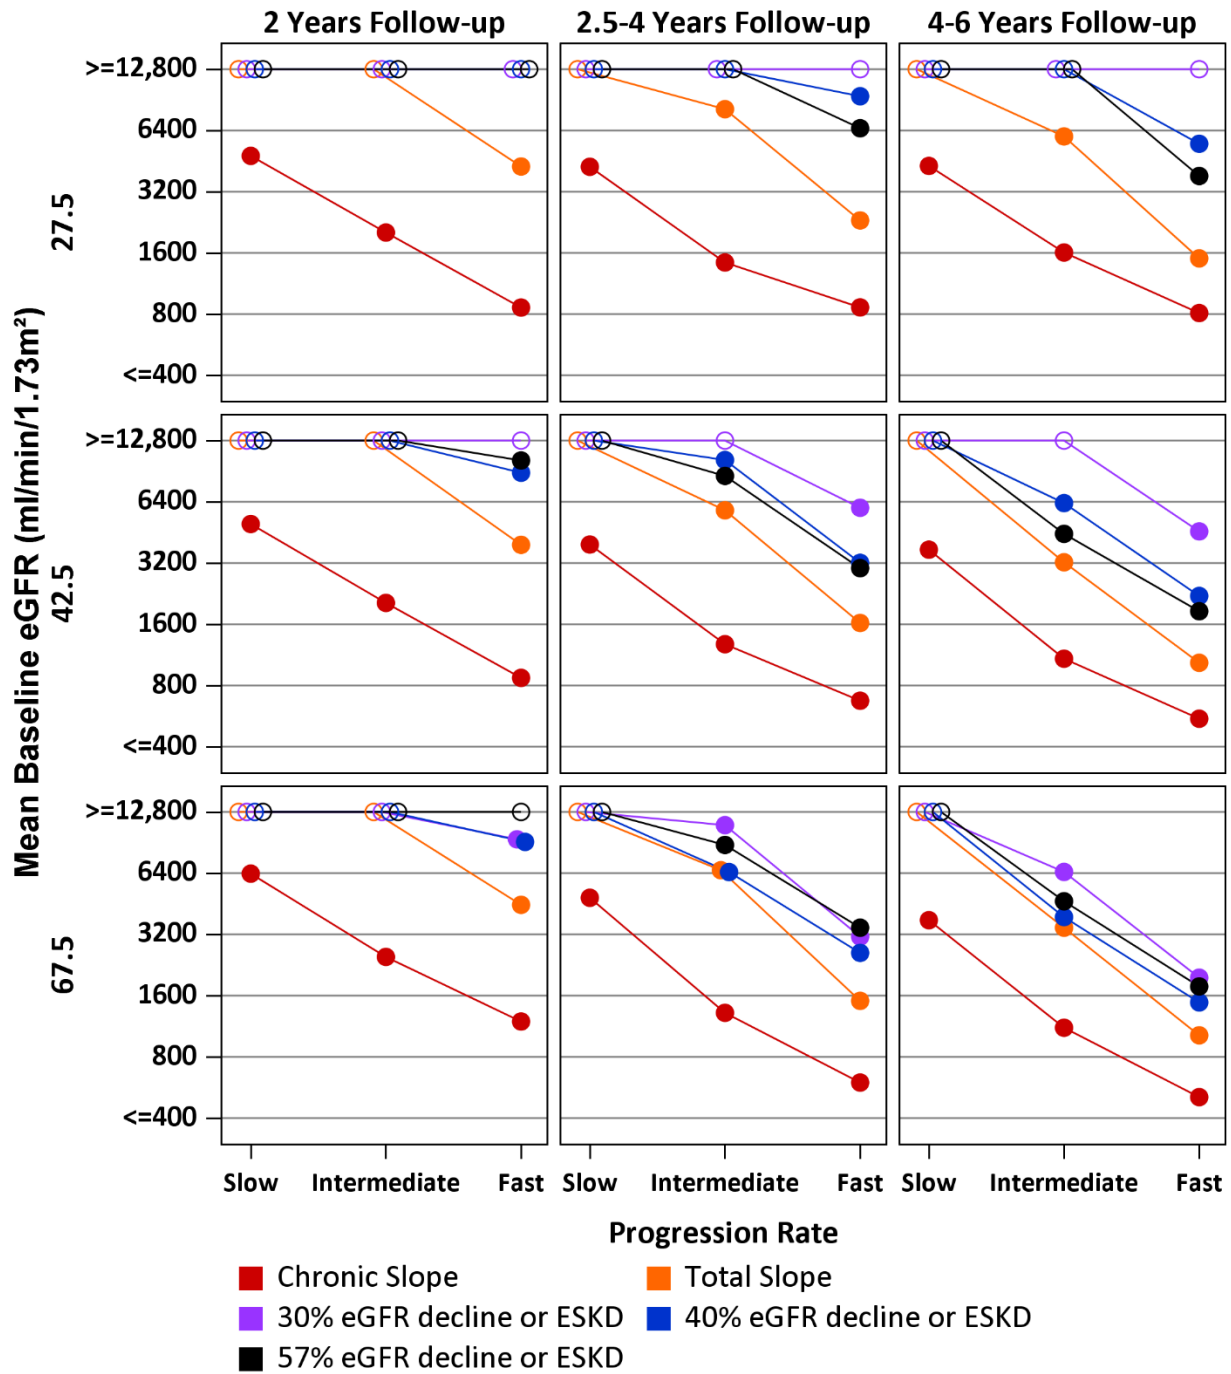

Supplemental Figure 6: Relationship of relative efficiency of alternative endpoints vs. standard deviation of GFR slopes when there is no acute effect and the long-term treatment effect is intermediate between proportional and uniform

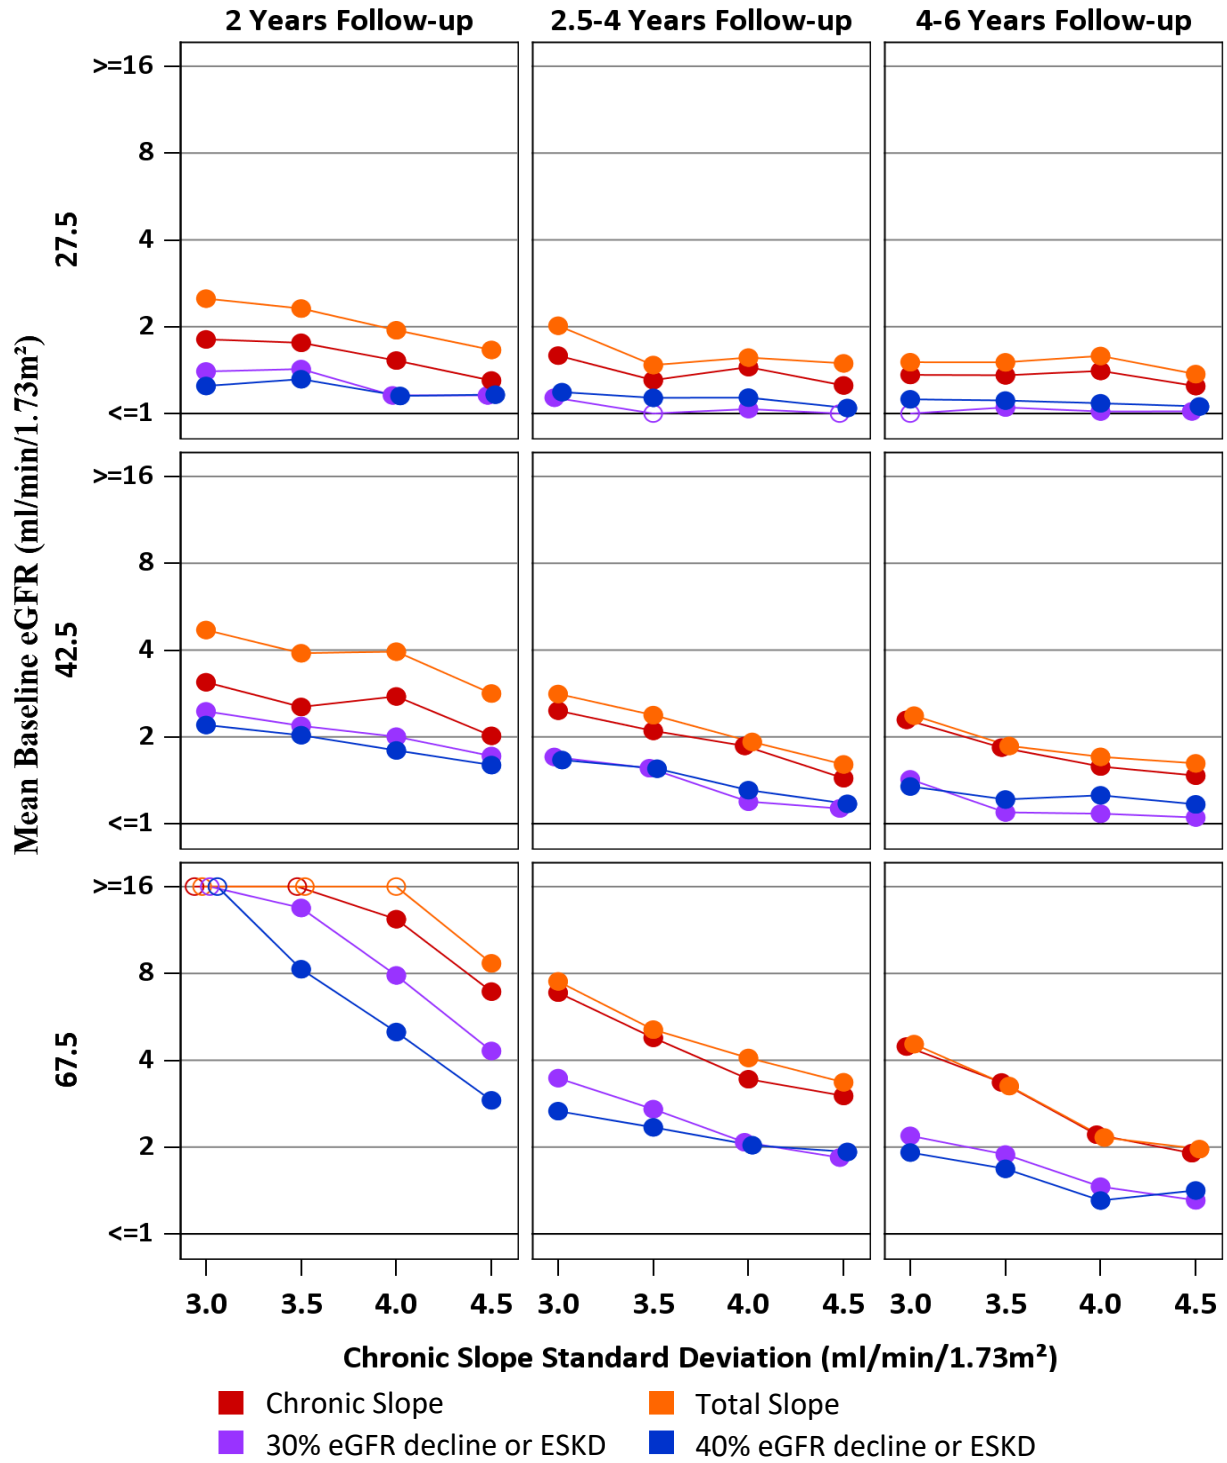

Supplemental Figure 7: Bias and risk of false positive and false negative conclusions when there is no long term treatment effect and follow-up time is short

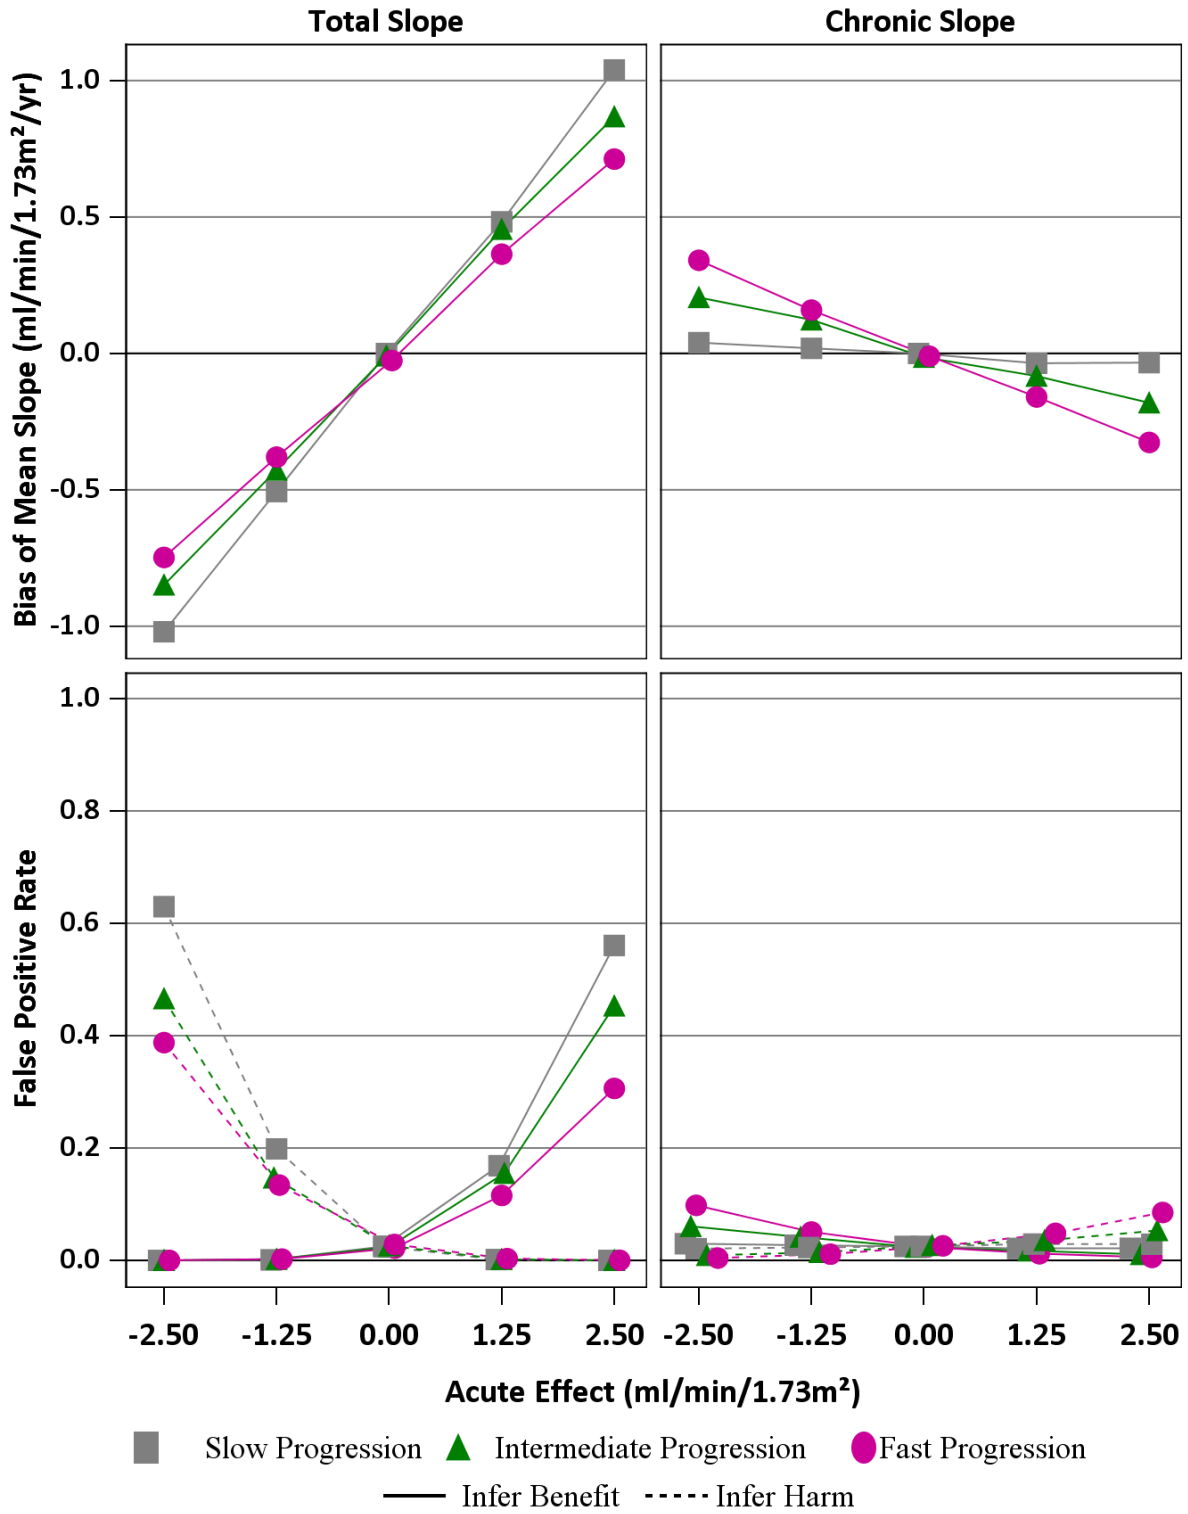

Supplemental Figure 8: Bias and risk of false positive and false negative conclusions when there is no long term treatment effect and follow-up time is long

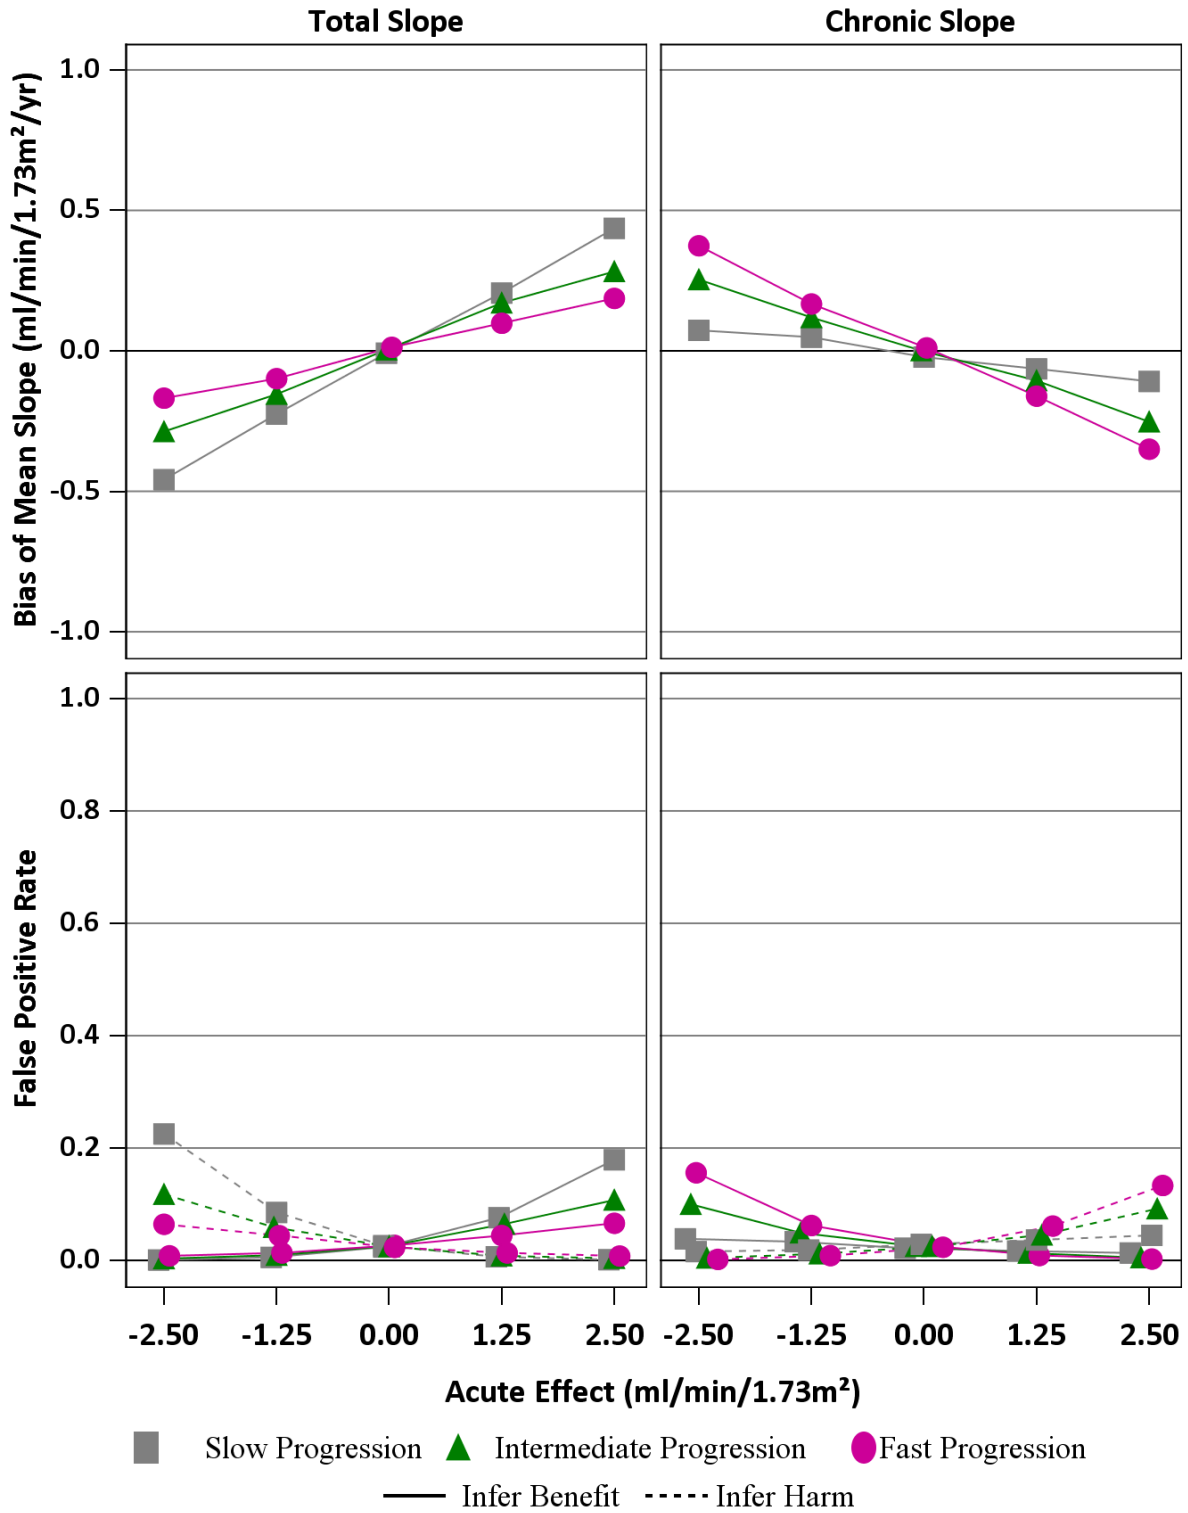



**Supplemental Figure 9: Estimated treatment effects on the chronic and total slopes when there is no long-term treatment effect and follow-up time is intermediate, and the acute effect does not attenuate**

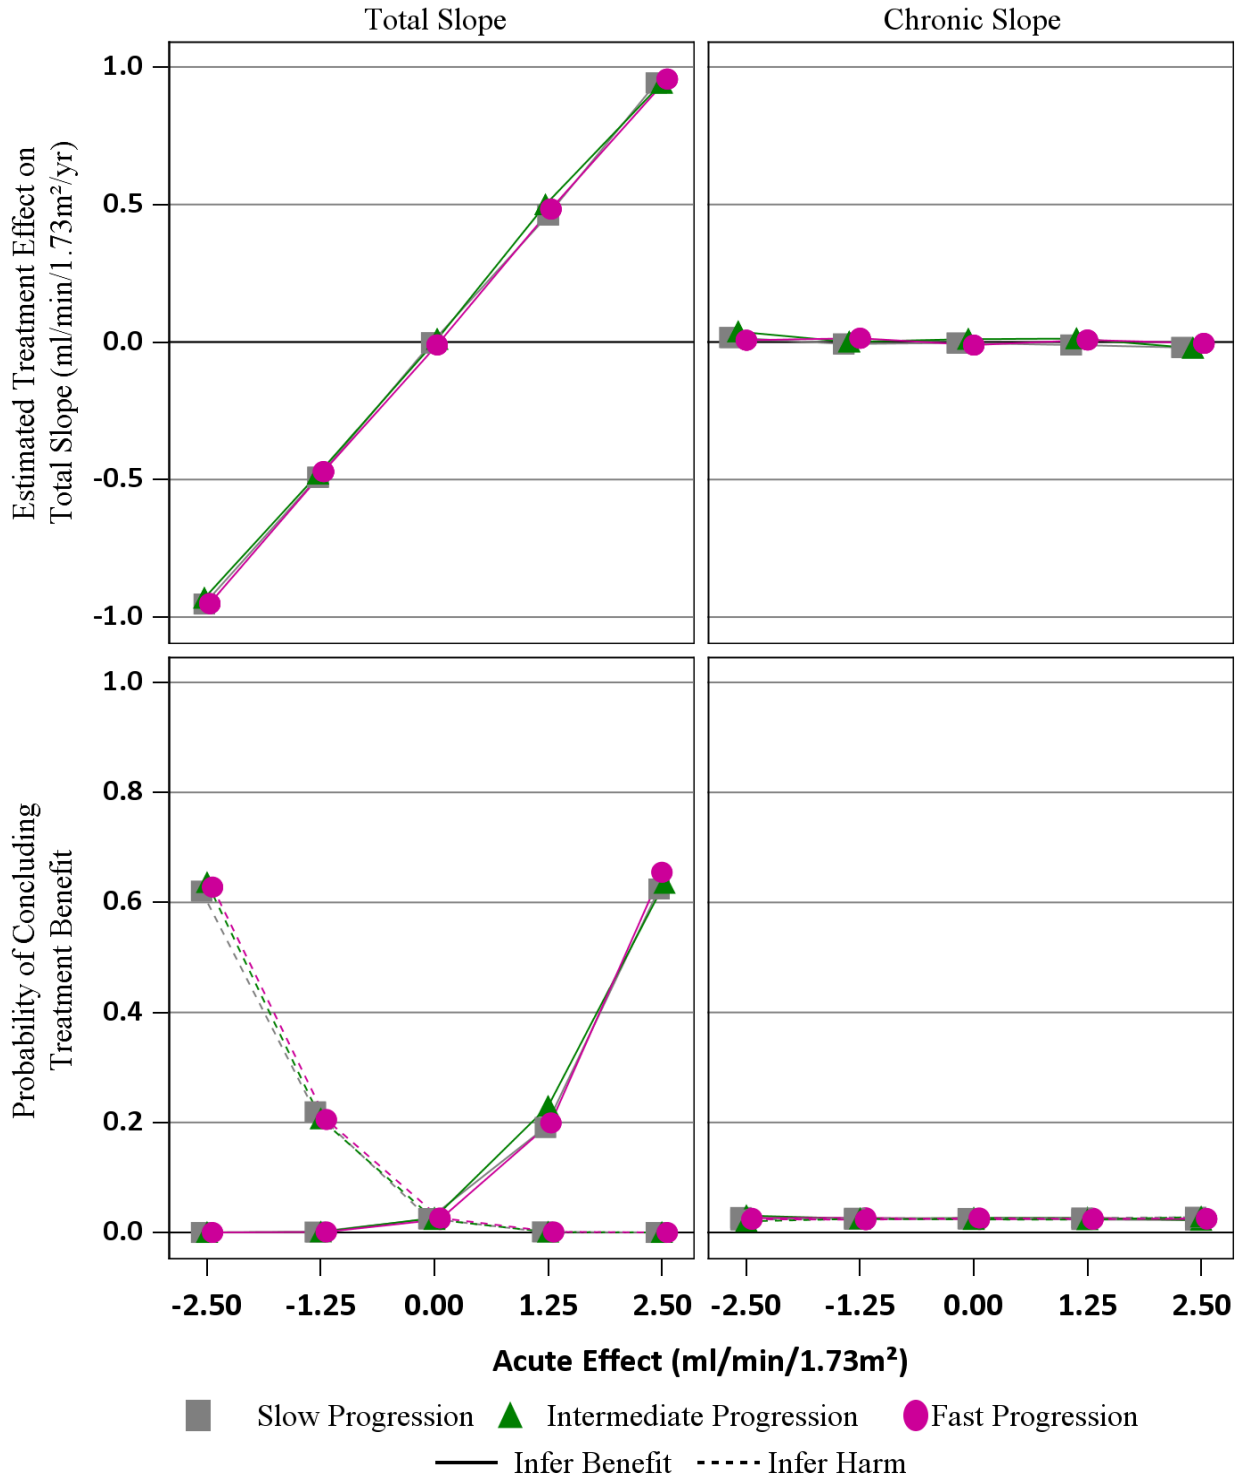

**Supplemental Appendix 5: Guide to Excel Spread Sheet with Expanded Results**

The file Exel Spreadsheet Expanded Results.xlsx includes 4 different sheets which provide the required total sample size, the relative efficiency vs. the clinical endpoint, and the standard error of the relative efficiency for the chronic slope, total slope, confirmed 30% GFR decline, and the confirmed 40% GFR decline for a total of 342 different scenarios. These scenarios for each of the 4 sheets are defined as below. Some entries are left blank due to insufficient precision, primarily due to insufficient events for the clinical endpoint for accurate analysis. All the scenarios presented in the Spreadsheet have long-term treatment effects which are intermediate between uniform and proportional.

**Part I: Full Attenuation of Acute Effects and Base-Case Scenarios for Slope and GFR Variability  
(Total of 135 rows)**

| Column Heading     | Mean Intercept            | Mean Slope                    | Follow-up Period | Slope SD                      | Residual GFR SD Around Trajectories | Long-Term Model | Acute Effect              |
|--------------------|---------------------------|-------------------------------|------------------|-------------------------------|-------------------------------------|-----------------|---------------------------|
| Units              | mL/min/1.73m <sup>2</sup> | mL/min/1.73m <sup>2</sup> /yr | years            | mL/min/1.73m <sup>2</sup> /yr | mL/min/1.73m <sup>2</sup>           | -               | mL/min/1.73m <sup>2</sup> |
| Scenarios Included | 27.5, 42.5, 67.5          | -1.5, -3.25, -5.0             | 2, 2.5-4, 4-6    | 4                             | Sqrt(0.817 x GFR)                   | Intermediate    | -2.5, -1.25, 0, 1.25, 2.5 |

**Part II: No Attenuation of Acute Effects and Base-Case Scenarios for Slope and GFR Variability  
(Total of 81 rows)**

| Column Heading     | Mean Intercept            | Mean Slope                    | Follow-up Period | Slope SD                      | Residual GFR SD Around Trajectories | Long-Term Model | Acute Effect              |
|--------------------|---------------------------|-------------------------------|------------------|-------------------------------|-------------------------------------|-----------------|---------------------------|
| Units              | mL/min/1.73m <sup>2</sup> | mL/min/1.73m <sup>2</sup> /yr | years            | mL/min/1.73m <sup>2</sup> /yr | mL/min/1.73m <sup>2</sup>           | -               | mL/min/1.73m <sup>2</sup> |
| Scenarios Included | 27.5, 42.5, 67.5          | -1.5, -3.25, -5.0             | 2, 2.5-4, 4-6    | 4                             | Sqrt(0.817 x GFR)                   | Intermediate    | -1.25, 0, 1.25            |

**Part III: No Acute Effect, Alternative Scenarios for Slope Variability  
(Total of 45 rows)**

| Column Heading     | Mean Intercept            | Mean Slope                    | Follow-up Period | Slope SD                      | Residual GFR SD Around Trajectories | Long-Term Model | Acute Effect              |
|--------------------|---------------------------|-------------------------------|------------------|-------------------------------|-------------------------------------|-----------------|---------------------------|
| Units              | mL/min/1.73m <sup>2</sup> | mL/min/1.73m <sup>2</sup> /yr | years            | mL/min/1.73m <sup>2</sup> /yr | mL/min/1.73m <sup>2</sup>           | -               | mL/min/1.73m <sup>2</sup> |
| Scenarios Included | 27.5, 42.5, 67.5          | -3.25                         | 2, 2.5-4, 4-6    | 2.5, 3, 3.5, 4, 4.5           | Sqrt(0.817 x GFR)                   | Intermediate    | 0                         |

**Part IV: Low Residual GFR Variability**

**(Total of 81 rows)**

| Column Heading     | Mean Intercept            | Mean Slope                    | Follow-up Period | Slope SD                      | Residual GFR SD Around Trajectories | Long-Term Model | Acute Effect              |
|--------------------|---------------------------|-------------------------------|------------------|-------------------------------|-------------------------------------|-----------------|---------------------------|
| Units              | mL/min/1.73m <sup>2</sup> | mL/min/1.73m <sup>2</sup> /yr | years            | mL/min/1.73m <sup>2</sup> /yr | mL/min/1.73m <sup>2</sup>           | -               | mL/min/1.73m <sup>2</sup> |
| Scenarios Included | 27.5, 42.5, 67.5          | -1.5, -3.25, -5.0             | 2, 2.5-4, 4-6    | 4                             | Sqrt(0.67 x GFR)                    | Intermediate    | -1.25, 0, 1.25            |

## Supplemental Appendix 6: Study funding sources

| Study name       | Funding                                                                                                                                                                                                                                                                                                                                                                                                                                                                                                                                                                                                                                                                                                                                                                                                                                                                                                                                                                                                                                                                                                                                                                                             |
|------------------|-----------------------------------------------------------------------------------------------------------------------------------------------------------------------------------------------------------------------------------------------------------------------------------------------------------------------------------------------------------------------------------------------------------------------------------------------------------------------------------------------------------------------------------------------------------------------------------------------------------------------------------------------------------------------------------------------------------------------------------------------------------------------------------------------------------------------------------------------------------------------------------------------------------------------------------------------------------------------------------------------------------------------------------------------------------------------------------------------------------------------------------------------------------------------------------------------------|
| AASK             | Supported by grants to each clinical center and the coordinating center from the National Institute of Diabetes and Digestive and Kidney Diseases. In addition, AASK was supported by the Office of Research in Minority Health (now the National Center on Minority Health and Health Disparities, NCMHD) and the following institutional grants from the National Institutes of Health: M01 RR-00080, M01 RR-00071, M0100032, P20-RR11145, M01 RR00827, M01 RR00052, 2P20 RR11104, RR029887, and DK 2818-02. King Pharmaceuticals provided monetary support and antihypertensive medications to each clinical center. Pfizer Inc., AstraZeneca Pharmaceuticals, Glaxo Smith Kline, Forest Laboratories, Pharmacia and Upjohn also donated antihypertensive medications.                                                                                                                                                                                                                                                                                                                                                                                                                           |
| ABCD             | Supported by Bayer and the National Institute of Diabetes, Digestive, and Kidney Diseases (DK50298-02)                                                                                                                                                                                                                                                                                                                                                                                                                                                                                                                                                                                                                                                                                                                                                                                                                                                                                                                                                                                                                                                                                              |
| ADVANCE          | ADVANCE was funded by grants from Servier and the National Health and Medical Research Council of Australia                                                                                                                                                                                                                                                                                                                                                                                                                                                                                                                                                                                                                                                                                                                                                                                                                                                                                                                                                                                                                                                                                         |
| AIPRI            | Supported by a grant from Ciba–Geigy                                                                                                                                                                                                                                                                                                                                                                                                                                                                                                                                                                                                                                                                                                                                                                                                                                                                                                                                                                                                                                                                                                                                                                |
| ALTITUDE         | Supported by Novartis                                                                                                                                                                                                                                                                                                                                                                                                                                                                                                                                                                                                                                                                                                                                                                                                                                                                                                                                                                                                                                                                                                                                                                               |
| Appel            | This study was supported in part by Roche Pharmaceuticals and the Glomerular Center at Columbia University as an investigator-initiated study (J.L. and G.A.), the NKF of NY/NJ under the Fred C. Trump Fellowship (J.L.), a KUFA fellowship (J.R.) and the Kidney Foundation of Canada (G.F.).                                                                                                                                                                                                                                                                                                                                                                                                                                                                                                                                                                                                                                                                                                                                                                                                                                                                                                     |
| Brenner          | Supported by Merck & Co.                                                                                                                                                                                                                                                                                                                                                                                                                                                                                                                                                                                                                                                                                                                                                                                                                                                                                                                                                                                                                                                                                                                                                                            |
| CanPREVENT       | Supported by the Memorial University of Newfoundland                                                                                                                                                                                                                                                                                                                                                                                                                                                                                                                                                                                                                                                                                                                                                                                                                                                                                                                                                                                                                                                                                                                                                |
| Chan             | Supported by the Wai Hung Charity Foundation and the Lee Wing Tat Renal Research Fund                                                                                                                                                                                                                                                                                                                                                                                                                                                                                                                                                                                                                                                                                                                                                                                                                                                                                                                                                                                                                                                                                                               |
| Donadio 2001     | Supported by research grants from Pronova Biocare a.s. (Oslo, Norway) and Mayo Foundation (Rochester, MN)                                                                                                                                                                                                                                                                                                                                                                                                                                                                                                                                                                                                                                                                                                                                                                                                                                                                                                                                                                                                                                                                                           |
| EMPA-REG OUTCOME | Supported by Boehringer Ingelheim (BI) and Eli Lilly                                                                                                                                                                                                                                                                                                                                                                                                                                                                                                                                                                                                                                                                                                                                                                                                                                                                                                                                                                                                                                                                                                                                                |
| Goicoechea       | Supported by REDINREN RD016/0019 FEDER funds                                                                                                                                                                                                                                                                                                                                                                                                                                                                                                                                                                                                                                                                                                                                                                                                                                                                                                                                                                                                                                                                                                                                                        |
| HALT-PKD         | Supported by grants from the National Institute of Diabetes and Digestive and Kidney Diseases (DK62410 to Dr. Torres, DK62408 to Dr. Chapman, DK62402 to Dr. Schrier, DK082230 to Dr. Moore, DK62411 to Dr. Perrone, and DK62401 to Washington University at St. Louis) and the National Center for Research Resources General Clinical Research Centers (RR000039 to Emory University, RR000585 to the Mayo Clinic, RR000054 to Tufts Medical Center, RR000051 to the University of Colorado, RR023940 to the University of Kansas Medical Center, and RR001032 to Beth Israel Deaconess Medical Center), National Center for Advancing Translational Sciences Clinical and Translational Science Awards (RR025008 and TR000454 to Emory University, RR024150 and TR00135 to the Mayo Clinic, RR025752 and TR001064 to Tufts University, RR025780 and TR001082 to the University of Colorado, RR025758 and TR001102 to Beth Israel Deaconess Medical Center, RR033179 and TR000001 to the University of Kansas Medical Center, and RR024989 and TR000439 to Cleveland Clinic), by funding from the Zell Family Foundation (to the University of Colorado), and by a grant from the PKD Foundation. |
| Hannedouche      | Supported by Merck Sharp & Dohme                                                                                                                                                                                                                                                                                                                                                                                                                                                                                                                                                                                                                                                                                                                                                                                                                                                                                                                                                                                                                                                                                                                                                                    |

|                 |                                                                                                                                                                                                                                                                                              |
|-----------------|----------------------------------------------------------------------------------------------------------------------------------------------------------------------------------------------------------------------------------------------------------------------------------------------|
| HKVIN           | Supported by Novartis Pharmaceuticals (Hong Kong) Ltd by providing the study medication and placebo                                                                                                                                                                                          |
| Hou             | Supported by a National Nature and Sciences Grant for Major Projects (30330300) and a People's Liberation Army Grant for Major Clinical Research (to Dr. Hou) and in part by Novartis                                                                                                        |
| IDNT            | Supported by the Bristol-Myers Squibb Institute for Medical Research and Sanofi–Synthelabo                                                                                                                                                                                                   |
| Ihle/Kincaid    | Supported in part by Merck & Co, Inc., West Point, PA                                                                                                                                                                                                                                        |
| Kamper          | Supported by Merck Sharp & Dohme                                                                                                                                                                                                                                                             |
| Lewis 1992      | Supported by grants (R01-AM-27769 and R01-AM-27770) from the Public Health Service                                                                                                                                                                                                           |
| Lewis 1993      | Supported by grants from the Public Health Service (5 R01-DK 39908, 5 R01-DK 39826, MO1-RR00030, MO1-RR00034, MO1-RR00036, MO1-RR00051, MO1-RR00058, MO1-RR00059, and MO1-RR00425) and by the Bristol-Myers Squibb Pharmaceutical Research Institute (Princeton, N.J.).                      |
| Maes            | The study medication was kindly provided by Hoffmann-LaRoche, Basel, Switzerland                                                                                                                                                                                                             |
| MASTERPLAN      | Supported by the Dutch Kidney Foundation, grant number PV-01, and the Netherlands Heart Foundation, grant number 2003B261. Unrestricted grants were provided by Amgen, Genzyme, Pfizer and Sanofi-Aventis                                                                                    |
| MDRD Study      | Supported by the National Institute of Diabetes, Digestive, and Kidney Diseases (NIDDK UO1 DK35073 and K23 DK67303, K23 DK02904). Funding for the MDRD Study included the formerly named Health Care and Financing Administration (HCFA); now the Center for Medicare and Medicaid Services. |
| ORIENT          | Supported by a research grant from Daiichi Sankyo                                                                                                                                                                                                                                            |
| Ponticelli 1989 | Supported in part by a grant (82.01308.04) from the Consiglio Nazionale delle Ricerche.                                                                                                                                                                                                      |
| Ponticelli 1998 | Supported in part by a grant from Ospedabc Maggiore di Milano                                                                                                                                                                                                                                |
| Ponticelli 2006 | This was a spontaneous clinical trial sponsored by the grant “Project Glomerulonephritis”                                                                                                                                                                                                    |
| Pozzi 2004      | The authors did not receive any financial support                                                                                                                                                                                                                                            |
| Pozzi 2010      | The authors did not receive any financial support                                                                                                                                                                                                                                            |
| Pozzi 2012      | The authors did not receive any financial support                                                                                                                                                                                                                                            |
| Praga 2007      | This study was partially supported by Astellas                                                                                                                                                                                                                                               |
| REIN            | Supported in part by a grant from Aventis Pharma SA, Antony, France.                                                                                                                                                                                                                         |
| REIN 2          | REIN2 was an independent, academic study, where Aventis Pharma SA, Antony (France) and SIMESA SpA (Italy) only provided study medication (ramipril and felodipine, respectively).                                                                                                            |
| RENAAL          | Supported by Merck & Co.                                                                                                                                                                                                                                                                     |
| ROAD            | Supported by a National Nature and Sciences Grant for Major Projects (30330300), a People's Liberation Army Grant for Major Clinical Research (2000), and National 11th Five-Years Plan Foundation (to F.F.H.)                                                                               |
| Schena          | Supported in part by a grant of University of Bari                                                                                                                                                                                                                                           |
| SHARP           | Funded by Merck & Co. and Schering Plough Corporation, which merged in 2009. Additional support was provided from the Australian National Health Medical Research Council, the British Heart Foundation and the Medical Research Council.                                                    |
| STOP-IgAN       | Supported by a grant (GFVT01044604) from the German Federal Ministry of Education and Research.                                                                                                                                                                                              |
| SUN-MACRO       | Sponsored by Keryx Biopharmaceuticals, Inc.                                                                                                                                                                                                                                                  |

Toto By grant RO1 DK53869A from the U.S. National Institute of Diabetes and Digestive and Kidney Diseases (Dr. Levey); grant RO1 HS 10064 from the Agency for Healthcare Research and Quality (Dr. Schmid); a grant from Dialysis Clinic, Inc., Paul Teschan Research Fund 1097-5 (Dr. Jafar); New England Medical Center St. Elizabeth's Hospital Clinical Research Fellowship, Boston, Massachusetts (Dr. Jafar); and an unrestricted grant from Merck Research Laboratories, West Point, Pennsylvania (Dr. Levey).

---

Van Essen Supported by Merck Sharp & Dohme, Haarlem, The Netherlands

---

## References

1. Greene T, Teng CC, Inker LA, et al. Utility and validity of estimated GFR-based surrogate time-to-event end points in CKD: a simulation study. *Am J Kidney Dis*. 2014;64(6):867-879.
2. Inker LA, Lambers Heerspink HJ, Mondal H, et al. GFR decline as an alternative end point to kidney failure in clinical trials: a meta-analysis of treatment effects from 37 randomized trials. *Am J Kidney Dis*. 2014;64(6):848-859.
3. Lambers Heerspink HJ, Tighiouart H, Sang Y, et al. GFR decline and subsequent risk of established kidney outcomes: a meta-analysis of 37 randomized controlled trials. *American Journal of Kidney Diseases*. 2014;64(6):860-866.
4. Levey AS, Inker LA, Matsushita K, et al. GFR decline as an end point for clinical trials in CKD: a scientific workshop sponsored by the National Kidney Foundation and the US Food and Drug Administration. *Am J Kidney Dis*. 2014;64(6):821-835.
5. Coresh J, Turin TC, Matsushita K, et al. Decline in estimated glomerular filtration rate and subsequent risk of end-stage renal disease and mortality. *JAMA*. 2014;311(24):2518-2531.
6. Stoycheff N, Pandya K, Okparavero A, et al. Early change in proteinuria as a surrogate outcome in kidney disease progression: a systematic review of previous analyses and creation of a patient-level pooled dataset. *Nephrology, dialysis, transplantation : official publication of the European Dialysis and Transplant Association - European Renal Association*. 2011;26(3):848-857.
7. Higgins J, Green S. Cochrane Handbook for Systematic Reviews of Interventions. In: The Cochrane Collaboration; 2011: Available from [www.cochrane-handbook.org](http://www.cochrane-handbook.org).
8. Lambers-Heerspink HJ, Kropelin TF, Hoekman J, de Zeeuw D. Drug-Induced Reduction in Albuminuria Is Associated with Subsequent Renoprotection: A Meta-Analysis. *J Am Soc Nephrol*. 2015;26(8):2055-2064.
9. Lewis EJ, Hunsicker LG, Clarke WR, et al. Renoprotective effect of the angiotensin-receptor antagonist irbesartan in patients with nephropathy due to type 2 diabetes. *The New England journal of medicine*. 2001;345(12):851-860.
10. Wright JT, Jr., Bakris G, Greene T, et al. Effect of blood pressure lowering and antihypertensive drug class on progression of hypertensive kidney disease: results from the AASK trial. *JAMA*. 2002;288(19):2421-2431.
11. Klahr S, Levey AS, Beck GJ, et al. The effects of dietary protein restriction and blood-pressure control on the progression of chronic renal disease. Modification of Diet in Renal Disease Study Group. *The New England journal of medicine*. 1994;330(13):877-884.
12. Estacio RO, Jeffers BW, Gifford N, Schrier RW. Effect of blood pressure control on diabetic microvascular complications in patients with hypertension and type 2 diabetes. *Diabetes care*. 2000;23 Suppl 2:B54-64.
13. Torres VE, Abebe KZ, Chapman AB, et al. Angiotensin blockade in late autosomal dominant polycystic kidney disease. *New England Journal of Medicine*. 2014;371(24):2267-2276.
14. Praga M, Gutierrez E, Gonzalez E, Morales E, Hernandez E. Treatment of IgA nephropathy with ACE inhibitors: a randomized and controlled trial. *J Am Soc Nephrol*. 2003;14(6):1578-1583.
15. Li PK, Leung CB, Chow KM, et al. Hong Kong study using valsartan in IgA nephropathy (HKVIN): a double-blind, randomized, placebo-controlled study. *Am J Kidney Dis*. 2006;47(5):751-760.
16. Ponticelli C, Passerini P, Salvadori M, et al. A randomized pilot trial comparing methylprednisolone plus a cytotoxic agent versus synthetic adrenocorticotrophic hormone in idiopathic membranous nephropathy. *Am J Kidney Dis*. 2006;47(2):233-240.
17. Ponticelli C, Zucchelli P, Passerini P, et al. A randomized trial of methylprednisolone and chlorambucil in idiopathic membranous nephropathy. *The New England journal of medicine*. 1989;320(1):8-13.

18. Ponticelli C, Altieri P, Scolari F, et al. A randomized study comparing methylprednisolone plus chlorambucil versus methylprednisolone plus cyclophosphamide in idiopathic membranous nephropathy. *J Am Soc Nephrol*. 1998;9(3):444-450.
19. Ponticelli C, Zucchelli P, Passerini P, Cesana B. Methylprednisolone plus chlorambucil as compared with methylprednisolone alone for the treatment of idiopathic membranous nephropathy. The Italian Idiopathic Membranous Nephropathy Treatment Study Group. *The New England journal of medicine*. 1992;327(9):599-603.
20. Maes BD, Oyen R, Claes K, et al. Mycophenolate mofetil in IgA nephropathy: results of a 3-year prospective placebo-controlled randomized study. *Kidney international*. 2004;65(5):1842-1849.
21. Frisch G, Lin J, Rosenstock J, et al. Mycophenolate mofetil (MMF) vs placebo in patients with moderately advanced IgA nephropathy: a double-blind randomized controlled trial. *Nephrology, dialysis, transplantation : official publication of the European Dialysis and Transplant Association - European Renal Association*. 2005;20(10):2139-2145.
22. Pozzi C, Andrulli S, Del Vecchio L, et al. Corticosteroid effectiveness in IgA nephropathy: long-term results of a randomized, controlled trial. *J Am Soc Nephrol*. 2004;15(1):157-163.
23. Pozzi C, Andrulli S, Pani A, et al. Addition of azathioprine to corticosteroids does not benefit patients with IgA nephropathy. *J Am Soc Nephrol*. 2010;21(10):1783-1790.
24. Pozzi C, Andrulli S, Pani A, et al. IgA nephropathy with severe chronic renal failure: a randomized controlled trial of corticosteroids and azathioprine. *Journal of nephrology*. 2013;26(1):86-93.
25. Katafuchi R, Ikeda K, Mizumasa T, et al. Controlled, prospective trial of steroid treatment in IgA nephropathy: a limitation of low-dose prednisolone therapy. *Am J Kidney Dis*. 2003;41(5):972-983.
26. Manno C, Torres DD, Rossini M, Pesce F, Schena FP. Randomized controlled clinical trial of corticosteroids plus ACE-inhibitors with long-term follow-up in proteinuric IgA nephropathy. *Nephrology, dialysis, transplantation : official publication of the European Dialysis and Transplant Association - European Renal Association*. 2009;24(12):3694-3701.
27. Laird NM, Ware JH. Random-effects models for longitudinal data. *Biometrics*. 1982:963-974.
28. Prentice RL. A log gamma model and its maximum likelihood estimation. *Biometrika*. 1974;61(3):539-544.
29. Vonesh EF, Greene T, Schluchter MD. Shared parameter models for the joint analysis of longitudinal data and event times. *Statistics in medicine*. 2006;25(1):143-163.
30. Vonesh E, Tighiouart H, Ying J, et al. Mixed-effects models for slope-based endpoints in clinical trials of chronic kidney disease. *Stat Med In Press*.
31. Kamper AL, Strandgaard S, Leyssac PP. Effect of enalapril on the progression of chronic renal failure. A randomized controlled trial. *American journal of hypertension*. 1992;5(7):423-430.
32. Ihle BU, Whitworth JA, Shahinfar S, Cnaan A, Kincaid-Smith PS, Becker GJ. Angiotensin-converting enzyme inhibition in nondiabetic progressive renal insufficiency: a controlled double-blind trial. *Am J Kidney Dis*. 1996;27(4):489-495.
33. Hou FF, Zhang X, Zhang GH, et al. Efficacy and safety of benazepril for advanced chronic renal insufficiency. *The New England journal of medicine*. 2006;354(2):131-140.
34. Hannedouche T, Landais P, Goldfarb B, et al. Randomised controlled trial of enalapril and beta blockers in non-diabetic chronic renal failure. *BMJ*. 1994;309(6958):833-837.
35. Brenner BM, Chertow GM. Congenital oligonephropathy: an inborn cause of adult hypertension and progressive renal injury? *Current opinion in nephrology and hypertension*. 1993;2(5):691-695.
36. Jafar TH, Stark PC, Schmid CH, et al. Progression of chronic kidney disease: the role of blood pressure control, proteinuria, and angiotensin-converting enzyme inhibition: a patient-level meta-analysis. *Annals of internal medicine*. 2003;139(4):244-252.



37. Maschio G, Alberti D, Janin G, et al. Effect of the angiotensin-converting-enzyme inhibitor benazepril on the progression of chronic renal insufficiency. The Angiotensin-Converting-Enzyme Inhibition in Progressive Renal Insufficiency Study Group. *The New England journal of medicine*. 1996;334(15):939-945.
38. Ruggenti P, Perna A, Gherardi G, et al. Renoprotective properties of ACE-inhibition in non-diabetic nephropathies with non-nephrotic proteinuria. *Lancet*. 1999;354(9176):359-364.
39. van Essen GG, Apperloo AJ, Rensma PL, et al. Are angiotensin converting enzyme inhibitors superior to beta blockers in retarding progressive renal function decline? *Kidney Int Suppl*. 1997;63:S58-62.
40. Schrier RW, Abebe KZ, Perrone RD, et al. Blood pressure in early autosomal dominant polycystic kidney disease. *New England Journal of Medicine*. 2014;371(24):2255-2266.
41. Parving HH, Brenner BM, McMurray JJ, et al. Cardiorenal end points in a trial of aliskiren for type 2 diabetes. *The New England journal of medicine*. 2012;367(23):2204-2213.
42. Brenner BM, Cooper ME, de Zeeuw D, et al. Effects of losartan on renal and cardiovascular outcomes in patients with type 2 diabetes and nephropathy. *The New England journal of medicine*. 2001;345(12):861-869.
43. Imai E, Chan JC, Ito S, et al. Effects of olmesartan on renal and cardiovascular outcomes in type 2 diabetes with overt nephropathy: a multicentre, randomised, placebo-controlled study. *Diabetologia*. 2011;54(12):2978-2986.
44. Lewis EJ, Hunsicker LG, Bain RP, Rohde RD. The effect of angiotensin-converting-enzyme inhibition on diabetic nephropathy. The Collaborative Study Group. *The New England journal of medicine*. 1993;329(20):1456-1462.
45. Zucchelli P, Zuccala A, Borghi M, et al. Long-term comparison between captopril and nifedipine in the progression of renal insufficiency. *Kidney international*. 1992;42(2):452-458.
46. Ruggenti P, Perna A, Loriga G, et al. Blood-pressure control for renoprotection in patients with non-diabetic chronic renal disease (REIN-2): multicentre, randomised controlled trial. *Lancet*. 2005;365(9463):939-946.
47. Donadio JV, Jr., Larson TS, Bergstralh EJ, Grande JP. A randomized trial of high-dose compared with low-dose omega-3 fatty acids in severe IgA nephropathy. *J Am Soc Nephrol*. 2001;12(4):791-799.
48. Rauen T, Eitner F, Fitzner C, et al. Intensive Supportive Care plus Immunosuppression in IgA Nephropathy. *New England Journal of Medicine*. 2015;373(23):2225-2236.
49. Donadio JV, Jr., Grande JP, Bergstralh EJ, Dart RA, Larson TS, Spencer DC. The long-term outcome of patients with IgA nephropathy treated with fish oil in a controlled trial. Mayo Nephrology Collaborative Group. *J Am Soc Nephrol*. 1999;10(8):1772-1777.
50. Lewis EJ, Hunsicker LG, Lan SP, Rohde RD, Lachin JM. A controlled trial of plasmapheresis therapy in severe lupus nephritis. The Lupus Nephritis Collaborative Study Group. *The New England journal of medicine*. 1992;326(21):1373-1379.
51. Chan TM, Tse KC, Tang CS, Mok MY, Li FK. Long-term study of mycophenolate mofetil as continuous induction and maintenance treatment for diffuse proliferative lupus nephritis. *J Am Soc Nephrol*. 2005;16(4):1076-1084.
52. Praga M, Barrio V, Juarez GF, Luno J. Tacrolimus monotherapy in membranous nephropathy: a randomized controlled trial. *Kidney international*. 2007;71(9):924-930.
53. Hou FF, Xie D, Zhang X, et al. Renoprotection of Optimal Antiproteinuric Doses (ROAD) Study: a randomized controlled study of benazepril and losartan in chronic renal insufficiency. *J Am Soc Nephrol*. 2007;18(6):1889-1898.
54. Packham DK, Wolfe R, Reutens AT, et al. Sulodexide fails to demonstrate renoprotection in overt type 2 diabetic nephropathy. *J Am Soc Nephrol*. 2012;23(1):123-130.

55. Zinman B, Wanner C, Lachin JM, et al. Empagliflozin, Cardiovascular Outcomes, and Mortality in Type 2 Diabetes. *The New England journal of medicine*. 2015;373(22):2117-2128.
56. Goicoechea M, Garcia de Vinuesa S, Verdalles U, et al. Allopurinol and progression of CKD and cardiovascular events: long-term follow-up of a randomized clinical trial. *Am J Kidney Dis*. 2015;65(4):543-549.
57. Patel A, MacMahon S, Chalmers J, et al. Intensive blood glucose control and vascular outcomes in patients with type 2 diabetes. *New England Journal Medicine*. 2008;358(24):2560-2572.
58. Peeters MJ, van Zuilen AD, van den Brand JA, et al. Nurse practitioner care improves renal outcome in patients with CKD. *J Am Soc Nephrol*. 2014;25(2):390-398.
59. Barrett BJ, Garg AX, Goeree R, et al. A nurse-coordinated model of care versus usual care for stage 3/4 chronic kidney disease in the community: a randomized controlled trial. *Clinical journal of the American Society of Nephrology : CJASN*. 2011;6(6):1241-1247.
60. Skali H, Uno H, Levey AS, Inker LA, Pfeffer MA, Solomon SD. Prognostic assessment of estimated glomerular filtration rate by the new Chronic Kidney Disease Epidemiology Collaboration equation in comparison with the Modification of Diet in Renal Disease Study equation. *American heart journal*. 2011;162(3):548-554.
61. Inker LA, Heerspink HJ, Tighiouart H, et al. GFR slope as a Surrogate End Point for Kidney Disease Progression in Clinical Trials: A Meta-analysis of Treatment Effects of Randomized Controlled Trials. *JASN In Press*.
